# **Identification of heat responsive genes in pea stipules and anthers through transcriptional profiling**

Shaoming Huang<sup>1</sup>, Krishna K. Kishore<sup>1</sup>, Reddy V.B. Lachagari<sup>2</sup>, Navajeet Chakravartty<sup>2</sup>,  
Rosalind A. Bueckert<sup>1</sup>, Bunyamin Tar'an<sup>1</sup>, and Thomas D. Warkentin<sup>1\*</sup>

<sup>1</sup>Department of Plant Sciences, University of Saskatchewan, Saskatoon, SK, Canada.

<sup>2</sup>AgriGenome Labs Pvt. Ltd., BTIC, MN iHub, Shamirpet, India.

\* Correspondence:

Corresponding Author

[tom.warkentin@usask.ca](mailto:tom.warkentin@usask.ca)

Author Contribution:

TW and KG conceptualized the study. SH, KG, RB, BT and TW designed the experiments; SH conducted the experiment, analysis and wrote the manuscript; RL, NC and KG contributed to sequencing data alignment and DEG analysis. All authors reviewed the manuscript.

## 1 **Abstract**

2 Field pea (*Pisum sativum* L.), a cool-season legume crop, is known for poor heat tolerance. Our  
3 previous work identified PR11-2 and PR11-90 as heat tolerant and susceptible lines in a  
4 recombinant inbred population. CDC Amarillo, a Canadian elite pea variety, was considered as  
5 another heat tolerant variety based on its similar field performance as PR11-2. This study aimed  
6 to characterize the differential transcription. Plants of these three varieties were stressed for 3h at  
7 38°C prior to self-pollination, and RNAs from heat stressed anthers and stipules on the same  
8 flowering node were extracted and sequenced via the Illumina NovaSeq platform for the  
9 characterization of heat responsive genes. *In silico* results were further validated by qPCR assay.  
10 Differentially expressed genes (DEGs) were identified at log<sub>2</sub> fold change, the three varieties  
11 shared 588 DEGs which were up-regulated and 220 genes which were down-regulated in anthers  
12 when subjected to heat treatment. In stipules, 879 DEGs (463/416 upregulation/downregulation)  
13 were consistent among varieties. The above heat-induced genes of the two plant organs were  
14 related to several biological processes i.e., response to heat, protein folding and DNA templated  
15 transcription. Ten gene ontology (GO) terms were over-represented in the consistently down-  
16 regulated DEGs of the two organs, and these terms were mainly related to cell wall  
17 macromolecule metabolism, lipid transport, lipid localization, and lipid metabolic processes. GO  
18 enrichment analysis on distinct DEGs of individual pea varieties suggested that heat affected  
19 biological processes were dynamic, and variety distinct responses provide insight into molecular  
20 mechanisms of heat-tolerance response. Several biological processes, e.g., cellular response to  
21 DNA damage stimulus in stipule, electron transport chain in anther that were only observed in  
22 heat induced PR11-2 and CDC Amarillo, and their relevance to field pea heat tolerance is worth  
23 further validation.

## 24 **Introduction**

25 Human activities have contributed approximately 1°C temperature increase globally since the  
26 Industrial Age, and are predicted to cause another 0.5-1°C increase in the period between 2030  
27 and 2052 according to current greenhouse gas emission rates [1]. The evidence of the rising  
28 temperature causing lowered grain production was reported in the three major crops, maize,  
29 wheat, and rice [2]. Heat stress (HS) also limits the production on legume crops including pea. In  
30 Canada, where its pea production accounts for one third of the global production, lowered grain  
31 yield was observed in summers when the maximum temperature exceeded 28 °C during  
32 flowering, or the seasonal temperature was over 17.5 °C [3, 4]. Because of the concern about a  
33 warming summer in North America, physiological studies on HS related damage on field pea,  
34 particularly the reproductive plant parts, have been conducted in the last decade. When pea  
35 plants at anthesis were exposed to 36/18°C day/night for 7 days in a growth chamber, the pollen  
36 germination percentage, pollen tube length, pod length, seed number per pod, and the seed–ovule  
37 ratio dropped dramatically compared to pea exposed to normal conditions of 24/18°C [5]. In  
38 addition, HS reduced both pollen and ovule viability, but pollen appeared to be more heat  
39 susceptible [6]. In terms of pea breeding, progress has also been made in the characterization of  
40 heat tolerance based on field trials. A longer duration from sowing to flowering termination, and  
41 greater pod production per plant contributed to increased grain yield potential at both hot and  
42 normal conditions, and several stable quantitative trait loci were characterized related to  
43 flowering and yield component traits [4]. Lodging resistance and the semi-leafless leaf type  
44 resulted in a cooler pea canopy and greater yield potential [7]. Additionally, the authors further  
45 characterized putative genomic loci of heat responsive traits, e.g., canopy temperature, pod  
46 number and chlorophyll concentration, via a pea genome wide association mapping study [8].

47 The discovery of heat responsive genes started with the characterization of heat shock protein  
48 (HSP) genes and their transcription factors (HSFs). Findings in this aspect were firstly well  
49 documented in *Arabidopsis thaliana*. In addition to the 21 known HSFs [9], the Arabidopsis heat  
50 response is partly mediated by 13 HSP20s [10], 18 HSP70s [11], seven HSP90s [12], and up to  
51 eight members of the HSP100s [13]. The gene family of HSP20 was most highly expressed  
52 under HS, followed by the gene family of HSP70 and HSP90, and the gene family of HSP100  
53 was not responsive to heat stress [14]. Subsequent studies on the global transcriptome profiling  
54 under HS revealed that heat responsive genes could expand to those other genes involved in  
55 plant hormone biosynthesis and signaling, calcium and sugar signaling, primary and secondary  
56 metabolism [15-17]. Cell wall and secondary metabolite pathways were also highly affected  
57 under HS in lentil [18]. However, both the number of up- and down-regulated genes and the ratio  
58 of up- and down-regulated genes under HS varied among the above mentioned studies depending  
59 on HS treatments, plant species, genotypes and different plant organs used for RNA isolation.  
60 Research on heat responsive gene discovery in pea is limited to the findings of HSP genes.  
61 Among the reported pea HSP genes, the expression of *PsHSP 18.1* and *PsHSP71.2* genes  
62 appeared to be heat inducible [19, 20]. The relation of HSPs to heat tolerance was subsequently  
63 confirmed as the induction of these HSP genes improved survival rate of pea seedlings and  
64 mature plants at high temperature [21]. Moreover, several HSP genes had greater heat-induced  
65 expression in one of the heat tolerant cultivars, Acc.623, than in one susceptible variety Acc.476.  
66 The conclusion that the heat tolerant variety, in general, outperformed the susceptible variety in  
67 terms of HSP heat induction threshold is still in question because this study did not conduct a full  
68 comparison of HSP heat induced expression patterns among the pair of pea heat tolerant and  
69 susceptible varieties.

70 Although lacking the reference genome previously, transcriptome profiling via RNA-seq studies  
71 were carried out in pea over the last decade, mainly focusing on the mining of genetic markers.  
72 The first pea transcriptome reference was developed using next generation sequencing with the  
73 Roche/454 platform [22]. Later Illumina high-throughput sequencing was applied to sequence 23  
74 cDNA libraries from multiple tissues of the Australian field pea cultivars Kasper and Parafield  
75 [23]. A large proportion of the assembled contigs were expressed in both cultivars. To date, no  
76 transcriptome-wide mapping of pea response to HS has been conducted, but this method was  
77 utilized in the discovery of responsive genes in field pea seed aging [24], root nodulation [25]  
78 and most recently in water-logging stress studies [26, 27]. The utilization of RNA-seq technique  
79 in pea HS research allows for the genome-wide mining of heat responsive genes and the global  
80 description of the complex regulatory pathway in the protection against HS at the cellular level,  
81 as well as comparative analysis of genes responsive to HS among different pea varieties, or  
82 between pea and other crop species. Thus, the objectives of this research included 1)  
83 characterization of additional gene response toward high temperature besides previously  
84 characterized pea HSP genes; 2) comparative analysis of heat responsive gene expression  
85 differences between anthers and stipules, as well as between heat tolerant and heat susceptible  
86 varieties.

## 87 **Methods**

### 88 **Plant materials**

89 Three pea varieties were used as plant material for this experiment, that is, PR11-2 (heat tolerant  
90 variety), PR11-90 (heat susceptible variety) and CDC Amarillo (check variety). PR11-2 and  
91 PR11-90 are recombinant inbred lines from the population PR11, which was derived from the

92 cross CDC Centennial/CDC Sage made in 2008 at the Crop Development Centre (CDC),  
 93 University of Saskatchewan [4]. CDC Centennial was developed at CDC. It is a high yielding  
 94 yellow pea cultivar with semi-leafless leaf type with moderately large seeds [28]. CDC Sage is a  
 95 high yielding cultivar from the CDC with green cotyledons and medium-small seeds [29]. PR11-  
 96 2 and PR11-90 have white flowers and green cotyledons, but PR11-2 has greater pod number per  
 97 plant, longer flowering duration and greater grain yield than PR11-90 based on field trials at both  
 98 normal and hot conditions, thus PR11-2 is considered to have better heat tolerance than PR11-90.  
 99 CDC Amarillo [30], a yellow pea variety and one of the best yielding varieties in western  
 100 Canada, was included as a check. Because CDC Amarillo has similar field performance as PR11-  
 101 2 in our field test at normal and heat stressful conditions (Table 1), it is also considered as heat  
 102 tolerant compared with PR11-90.

103

104 **Table 1. Characteristics of flowering and yield-related traits of PR11-2, PR11-90 and CDC**  
 105 **Amarillo at normal and late seeding trials in 2017-2019 at Saskatoon, Canada.**

| variety      | seeding date | DTF  | DOF  | RNN | PN  | SNPP | TSW(g) | plot yield(kg/ha) |
|--------------|--------------|------|------|-----|-----|------|--------|-------------------|
| PR11-2       | normal       | 56.9 | 15.6 | 5.4 | 7.7 | 4.1  | 215.4  | 2827.7            |
|              | late         | 51.9 | 12.7 | 4.8 | 7.4 | 3.5  | 216.6  | 2665.2            |
| PR11-90      | normal       | 48.0 | 17.7 | 4.5 | 7.1 | 5.8  | 200.9  | 2288.9            |
|              | late         | 47.7 | 13.0 | 3.3 | 5.2 | 4.8  | 177.6  | 1144.9            |
| CDC Amarillo | normal       | 56.5 | 14.5 | 5.0 | 7.6 | 4.6  | 236.4  | 3064.5            |
|              | late         | 51.4 | 13.6 | 4.4 | 7.1 | 3.9  | 200.9  | 2734.2            |

106 Note: DTF, days to flowering; DOF, duration of flowering; RNN, reproductive node number on  
 107 main-stem; PN, pod number on main-stem; SNPP, seed number per pod; TSW, thousand seed  
 108 weight (g). Late seeding trail is more heat stressful trial.

109

## 110 **Experimental design**

111 A randomized complete block design experiment utilizing the three varieties with three  
112 biological reps and two temperature treatments was carried out in a phytotron chamber in the  
113 Agriculture Building, University of Saskatchewan. Temperature treatments consisted of control  
114 temperature treatment 24/16°C, 16/8h day/night, and high temperature treatment 38/16°C, 16/8h  
115 day/night. Three seeds of each variety were planted in individual 3.8 L pots containing Sunshine  
116 mix #4 (Sun Gro, Seba Beach, AB, Canada). The three plants in one pot were bulked later as one  
117 biological replication. Starting from 1 week after crop emergence, the plants were watered every  
118 2-3 days based on the growth stage and water use. Once a week, a quick release fertilizer (20  
119 N:20 P<sub>2</sub>O<sub>5</sub>:20 K<sub>2</sub>O) prepared at a concentration of 3 g L<sup>-1</sup> was applied at a rate of 100 ml per pot  
120 starting 1 week after emergence. At the stage when plants developed the first flower bud, but  
121 before anther dehiscence, pots of all varieties in the heat treatment group were transferred to a  
122 38°C chamber for 3h. Then all the anthers and stipules on the first flowering node of the three  
123 plants within one pot were sampled from both normal and high temperature treatments, and then  
124 were freshly frozen in liquid nitrogen and kept at -80°C for storage.

## 125 **RNA extraction and RNA integrity check**

126 The whole experiment constituted a library of 36 samples from three varieties, two plant organs,  
127 two temperature treatments and three biological reps, as detailed in the previous section. For  
128 each organ sample, the extraction of total RNA was conducted using QIAGEN RNeasy plant  
129 mini kit from QIAGEN Inc, and then a further clean-up step by digesting any remaining DNA  
130 contaminant was carried out using QIAGEN RNase-free DNase set. The quantity of extracted  
131 RNA sample was then determined by evaluating optical density at 260 nm and the

132 OD260/OD280 absorption ratio using NanoDrop 8000 UV spectrophotometer. The integrity of  
133 all 36 RNA samples were profiled for integrity via Bioanalyzer 2100 according to the  
134 manufacturer's manual, and all RNA samples had integrity scores in the range of 9-10 on the  
135 scale of 0-10, which passed the integrity standard for sequencing.

## 136 **RNA-Seq protocol**

137 Construction of cDNA libraries and subsequent sequencing was done at MedGenome Inc  
138 (<https://www.medgenome.com>, Foster City, CA, USA).

## 139 **Raw data processing and sequencing read alignment**

140 In the pre-processing step of the raw reads, the adapter sequences and low-quality bases were  
141 trimmed using AdpaterRemoval-V2 [31]. From the preprocessed reads, ribosomal RNA  
142 sequences were removed by aligning the reads with SILVA database [32] using Bowtie2\_v2.2.9  
143 [33]. The remaining reads were aligned to the pea reference genome (*Pisum\_sativum\_v1a.fa*)  
144 and gene model (*Pisum\_sativum\_v1a\_genes.gff3*) [34]. The alignment was preformed using  
145 STAR\_v2.5.3a [35].

## 146 **Differential gene expression analysis and annotation**

147 Firstly, a homology search was executed for all 44,756 gene sequences against UniProt plant  
148 [36] using Diamond\_v0.9.3.104 [37]. Out of 44,756 genes, 33,669 genes were annotated based  
149 on tophit. Then for each variety, the differential expression analysis between heat-treatment (3H  
150 38°C) and control (22°C) was conducted via cuffdiff program in cufflinks package\_v 2.2.1 [38].  
151 Log<sub>2</sub> fold change (FC) cutoff 2/-2 and p-value cutoffs 0.01 were used separately as cutoffs for  
152 up and down regulated genes to characterize differentially expressed genes (DEGs). The unit of



153 measurement used by Cufflinks to estimate transcript abundance is fragments per kilobase of  
154 transcript per million mapped reads.

## 155 **Quantitative real-time PCR validation**

156 To validate the correctness of above DEG results analysed *in silico*, qPCR bench assay was  
157 conducted to test the result consistency between the two methods. Eleven random genes were  
158 originally selected from the pea genome and primers were designed for each gene via IDT  
159 Primer quest tool (Integrated DNA Technologies Inc) according to the following criteria, i.e., T<sub>m</sub>  
160 of 62 ± 1°C, PCR amplicon lengths of 90-120 bp, primer length of 20-22 bp, and GC content of  
161 45-55%. A series of 10-time cDNA dilutions on PR11-90\_control leaf cDNA library was made  
162 for primer efficiency test. And primer efficiency (%) of each gene was equaled to  $(10^{-1/slope}$   
163  $-1) * 100$ , and all primers had their efficiency rates between 90-110% and qualified for assay  
164 use (S1 Fig).

165 Subsequently, the relative expression of the 11 genes was separately quantified among 18 stipule  
166 samples and the 18 anther samples, which were used for RNA sequencing. RT-qPCR data were  
167 analyzed according to the comparative  $2^{-\Delta\Delta Ct}$  method [39], where  $\Delta Ct = (Ct \text{ of gene of interest} -$   
168  $Ct \text{ of reference gene})$ . The relative gene expression change was compared between qPCR bench  
169 assay and RNA-Seq on stipules and anthers separately.

## 170 **Gene ontology (GO) enrichment analysis on DEGs**

171 Further comparative analyses on DEGs were conducted among the three pea varieties with  
172 different heat tolerances, and between anther (reproductive plant organ) and stipule (vegetative  
173 plant organ). The results were output in Venn diagram via online software  
174 (<http://bioinformatics.psb.ugent.be/webtools/Venn/>). Subsequently, GO terms of heat responsive

175 genes were tested against the pea reference transcriptome (Pisum\_sativum\_v1a\_GO, database  
176 was retrieved in November, 2020) via agriGO v2.0 [40], and significant GO terms in biological  
177 processes were filtered using hypergeometric test method at FDR adjusted p value<0.01.

## 178 **Results**

### 179 **Sequencing quality assessment**

180 To understand transcriptional reprogramming of field pea in response to heat stress, we  
181 performed deep RNA sequencing of stipule and anther organs subjected to 38°C for 3h among  
182 three varieties using the NovoSeq sequencing platform. The sequencing platform produced a  
183 high confidence sequencing output with a <2% maximum read error rate among the 36 libraries.  
184 After removing the error reads, the anther libraries had an average of 84 million 100 bp paired-  
185 end reads across the three varieties (Table 2). Stipule libraries resulted in a similar average of 88  
186 million reads (Table 3). Both types of libraries outputted high sequencing depths for the global  
187 transcriptome analysis as compared with previous pea transcriptome studies [23, 25].  
188 Subsequently the reads were mapped to the pea reference genome [34], and nearly all reads were  
189 successfully aligned to the pea genome, which also implies good quality of the deep sequencing.

190 **Table 2. Summary of sequencing depth and percentage of sequencing reads aligning to pea**  
191 **genome on anther samples.**

| Genotype     | Rep | Treatment     | No. of million reads | Alignment (%) |
|--------------|-----|---------------|----------------------|---------------|
| CDC Amarillo | 1   | 22°C control  | 65.2                 | 99.6          |
| CDC Amarillo | 2   | 22°C control  | 100.1                | 99.7          |
| CDC Amarillo | 3   | 22°C control  | 88.3                 | 99.7          |
| CDC Amarillo | 1   | 38°C stressed | 65.0                 | 99.2          |
| CDC Amarillo | 2   | 38°C stressed | 88.1                 | 99.2          |
| CDC Amarillo | 3   | 38°C stressed | 87.4                 | 99.6          |

|         |   |               |      |      |
|---------|---|---------------|------|------|
| PR11-2  | 1 | 22°C control  | 74.4 | 99.7 |
| PR11-2  | 2 | 22°C control  | 75.9 | 99.7 |
| PR11-2  | 3 | 22°C control  | 94.6 | 99.8 |
| PR11-2  | 1 | 38°C stressed | 83.8 | 99.1 |
| PR11-2  | 2 | 38°C stressed | 82.1 | 99.0 |
| PR11-2  | 3 | 38°C stressed | 80.8 | 99.2 |
| PR11-90 | 1 | 22°C control  | 88.6 | 99.6 |
| PR11-90 | 2 | 22°C control  | 80.2 | 99.7 |
| PR11-90 | 3 | 22°C control  | 98.0 | 99.7 |
| PR11-90 | 1 | 38°C stressed | 85.0 | 99.6 |
| PR11-90 | 2 | 38°C stressed | 85.7 | 99.4 |
| PR11-90 | 3 | 38°C stressed | 90.9 | 99.4 |

192

193 **Table 3. Summary of sequencing depth and percentage of sequencing reads aligning with**  
 194 **pea genome on stipule samples.**

| Genotype     | Rep | Treatment     | No. of million reads | Alignment (%) |
|--------------|-----|---------------|----------------------|---------------|
| CDC Amarillo | 1   | 22°C control  | 101.7                | 99.3          |
| CDC Amarillo | 2   | 22°C control  | 92.1                 | 99.5          |
| CDC Amarillo | 3   | 22°C control  | 100.1                | 99.5          |
| CDC Amarillo | 1   | 38°C stressed | 82.6                 | 97.3          |
| CDC Amarillo | 2   | 38°C stressed | 78.3                 | 98.4          |
| CDC Amarillo | 3   | 38°C stressed | 80.4                 | 99.1          |
| PR11-2       | 1   | 22°C control  | 90.3                 | 99.6          |
| PR11-2       | 2   | 22°C control  | 90.4                 | 99.3          |
| PR11-2       | 3   | 22°C control  | 87.9                 | 99.6          |
| PR11-2       | 1   | 38°C stressed | 85.2                 | 98.8          |
| PR11-2       | 2   | 38°C stressed | 84.7                 | 99.3          |
| PR11-2       | 3   | 38°C stressed | 106.4                | 99.3          |
| PR11-90      | 1   | 22°C control  | 77.5                 | 99.0          |
| PR11-90      | 2   | 22°C control  | 109.8                | 99.6          |
| PR11-90      | 3   | 22°C control  | 80.4                 | 99.5          |
| PR11-90      | 1   | 38°C stressed | 74.7                 | 98.9          |
| PR11-90      | 2   | 38°C stressed | 66.5                 | 99.0          |
| PR11-90      | 3   | 38°C stressed | 107.7                | 99.3          |

## 195 **DEG analysis validation**

196 The stipule expression response (log<sub>2</sub> FC) of the 11 randomly selected genes between heat  
197 treatment and control temperature were characterized via cuffdiff program and qPCR  
198 respectively, and the results are shown in a heat map. Nine genes out of the eleven, had  
199 consistent heat responses between qPCR and RNA-Seq result *in silico* (Fig 1), implying a good  
200 quality of RNA-Seq analysis. And the significant correlation ( $R^2 = 0.97$ ) between bench result  
201 and *in silico* result further confirmed a correct analysis via cuffdiff program (Fig 2a). Two genes  
202 had some unmatched results between the two methods. 0s3930g0040 displayed a consistently  
203 up-regulated expression via qPCR among the three pea varieties when subjected to heat  
204 treatment (Fig 1), whereas for the *in silico* result only CDC Amarillo had the same trend. From  
205 *in silico* result, 5g006560 demonstrated a consistent downregulation towards HS in all varieties;  
206 whereas in qPCR result, only PR11-90 had the similar trend. Likewise, among anther samples, a  
207 high consistency was found between bench results and cuffdiff result (Fig 1 and 2b). Unmatched  
208 results were mainly observed on gene 5g006560. The significantly high correlation ( $R^2 = 0.93$ )  
209 between the two methods confirmed the correctness of the analyses. The qPCR results  
210 successfully validated the correctness of RNA-Seq analysis on both anther and stipule samples.

211

212 **Fig 1. Transcriptional heat response heatmap of 11 randomly selected genes in the pea**  
213 **genome via qPCR and cuffdiff *in silico* methods. FC values are the average log<sub>2</sub> (FC)**  
214 **across three biological reps; red color is for upregulation and blue color is for**  
215 **downregulation.**

216

217 **Fig 2. Gene expression result correlation on stipule samples (panel a) and anther samples**  
218 **(panel b) between qPCR and cuffdiff program.**

219

220 **Global comparisons of HS related transcriptomes between stipules**  
221 **and anthers among three pea varieties**

222 To gain the knowledge on gene response to heat treatment, genes whose expression differed  
223 between HS and control temperature at  $\log_2|FC| \geq 2$  were characterized as heat responsive genes.  
224 A total of 3565 responsive genes were identified in anthers, among which 2322 genes had greater  
225 expression and 1243 had lower expression in heat treatment compared to control temperature.  
226 Stipules on the same flowering node had 4381 responsive genes, with 1886 up-regulated genes  
227 and 2495 down-regulated genes. Among anther transcriptomes of the three varieties, the number  
228 of genes that were up-regulated under HS was almost twice the number of down-regulated genes  
229 (Fig 3). The three varieties shared 588 genes with up-regulated expression under HS, which  
230 comprised of 25% up-regulated genes in total. The overlap between PR11-2 and PR11-90, where  
231 the two varieties were derived from the same recombinant inbred population, accounted for a  
232 higher proportion (~70% in PR11-2 and ~60% in PR11-90). CDC Amarillo, which has a  
233 different genetic background, contributed a major group of DEGs that were distinctly up-  
234 regulated. Among the 1343 genes whose expression was inhibited, 220 genes were found  
235 common among the three varieties.

236 Whereas among the surrounding stipule leaf transcriptomes, the pattern was opposite compared  
237 to the anther transcriptome, i.e., a greater number of genes were down-regulated in the heat  
238 treatment. The result revealed a different heat response in stipules compared to anthers. Still,

239 there were common DEGs between anthers and stipules, 220 common DEGs with their up-  
240 regulated expression and 25 DEGs with down-regulated expression. Respective gene ontology  
241 (GO) enrichment analysis of the two groups of DEGs was conducted to cluster their functions in  
242 plant biological processes, and results were elucidated in the section below on GO analysis.

243 Among the three varieties, PR11-2, considered to be best heat tolerant, had the lowest number of  
244 its DEGs in both anthers and stipules, indicating that PR11-2 might be able to maintain a  
245 relatively steady transcriptome when subjected to short term HS. In anthers, PR11-90 had a  
246 similar number of total DEGs as that of CDC Amarillo, but CDC Amarillo had a greater number  
247 of up-regulated genes and a less number of down-regulated genes than PR11-90. Whereas in  
248 stipules, CDC Amarillo had both higher number of up-regulated and down-regulated genes than  
249 PR11-90. It is worth noting that CDC Amarillo appeared to have more unique DEGs in heat  
250 response compared with the other two varieties whose genetic backgrounds were more similar.  
251 This finding implied that heat response could depend on genetic variability.

252

253 **Fig 3. Venn diagram showing the number of common and specific differentially expressed**  
254 **genes ( $\log_2 |FC| \geq 2$ ; false discovery rate  $< 0.05$ ) at 3h 38°C heat treatment among three pea**  
255 **varieties, and between anther and stipule on the same node. Panel a-c are for up-regulated**  
256 **genes (from the left to right are anther, stipule and comparison between the two. Panel d-f are for**  
257 **down-regulated genes in the same order mentioned above.**

258

## 259 **GO grouping on common DEGs among varieties**

260 With the purpose of characterizing a general pea plant heat response, GO enrichment analysis  
261 was conducted on the common DEGs among the three pea varieties in this study. In anthers, GO  
262 terms relating to the 588 common up-regulated genes and 220 down-regulated genes were tested  
263 separately against the pea reference transcriptome (Pisum\_sativum\_v1a\_GO, database was  
264 retrieved in November, 2020) to identify the significantly over-represented GO terms in  
265 biological processes under HS. All significant GO terms were filtered via hypergeometric test  
266 method at FDR adjusted p value  $\leq 0.01$ . Respective analysis was similarly conducted on the  
267 common genes in stipules as well, i.e., 463 DEGs with upregulation and 416 DEGs with  
268 downregulation. Up-regulated genes were enriched with 31 and 13 GO terms in biological  
269 processes for anthers and stipules, respectively (Fig 4, S1 Table). The top 10 most significant GO  
270 terms in anthers were protein folding (GO:0006457, 21 enriched terms), embryo development  
271 (GO:0009790, 9), multicellular organismal process (GO:0032501, 17), response to heat  
272 (GO:0009408, 5), multicellular organism development (GO:0007275, 15), galactose metabolic  
273 process (GO:0006012, 4), regulation of transcription, DNA-templated (GO:0045449, 43),  
274 regulation of cellular metabolic process (GO:0031323, 44), regulation of RNA metabolic process  
275 (GO:0051252, 26), and regulation of gene expression (GO:0010468, 44). In the stipules located  
276 on the same anther bearing node, the ten most over-represented GO terms were protein folding  
277 (GO:0006457, 13), response to heat (GO:0009408, 4), cellular protein modification process  
278 (GO:0006464, 12), carbohydrate metabolic process (GO:0005975, 80), post-translational protein  
279 modification (GO:0043687, 12), transcription, DNA-templated (GO:0006351, 21), RNA  
280 biosynthetic process (GO:0032774, 19), phosphate-containing compound metabolic process  
281 (GO:0006796, 11), phosphorus metabolic process (GO:0006793, 11) and regulation of RNA

282 metabolic process (GO:0051252, 18). Four GO terms were common between anthers and  
283 stipules, which were GO:0006457 (protein folding), GO:0009408 (response to heat),  
284 GO:0006351 (transcription, DNA-templated) and GO:0051252 (regulation of RNA metabolic  
285 process). GO:0051252 is one of the ancestor terms of GO:0006351 in the cluster. Other enriched  
286 GO terms of consistently up-regulated genes in anthers were involved with primary metabolic  
287 processes, cellular respiration and reproductive structure development and the regulations of  
288 several biosynthetic and metabolic clusters including cellular metabolic and biosynthetic process,  
289 RNA metabolic process, macromolecule metabolic and biosynthetic process (S1 Table).

290

291 **Fig 4. Top ten over-representative GO terms with up-regulation at log<sub>2</sub> FC >2 in biological**  
292 **process in anthers (blue column) and stipules (orange column).**

293

294 To further compare the most heat responsive genes among different varieties, we arbitrarily  
295 filtered the DEGs of each variety within the top 20% fold threshold range and found the most  
296 heat inducible genes were quite similar, though the greatest gene expression fold threshold varied  
297 slightly among the three varieties. The gene group relating to heat shock transcription factor  
298 (HSF) and heat shock protein (HSP) accounted for a large proportion.

299 Many of these HSF and HSP genes were reported here for the first time; HSF genes in particular,  
300 which expanded the previously limited findings. Putative HSF family A and B genes appeared to  
301 heat inducible, these genes included three HSF A genes and two HSF B genes (corresponding  
302 gene locus refers to Table 4). In addition to the two pea HSP genes that were previously  
303 documented, 11 other small HSP genes on chromosomes II, IV, V, VI and VII were highly heat



304 inducible among all varieties regardless of plant organs. Increased expression of six HSP70  
305 genes, two HSP90 family genes and three other HSP genes were also identified among all three  
306 varieties. Several heat shock cognate genes (HSCs), whose expression was previously considered  
307 as constitutive during normal plant development, appeared to be heat responsive as well (e.g.  
308 PsHSC 71.0, HSC 70-2 like etc). The response of several other genes whose functions closely  
309 interacted with HSP were also detected in this study.

310 Interestingly, several HSP genes only responded in one organ. Anthers had unique HSFs  
311 (Psat0s3914g0040, putative HSF; Psat4g086800, HSF24-like), three HSP genes which were  
312 Psat1g222760 (Stromal HSP70), Psat3g104360 (HSP83-like fragment), Psat5g229840 (class IV  
313 HSP). Stipules had unique HSF (Psat6g078240, HSF A3-like) and two HSP genes  
314 (Psat7g255520, HSP26.5; Psat3g180040, HSC70 2-like). Several other HSF and HSP genes  
315 were specific to variety, e.g., two HSP relating genes (Psat4g003160 and Psat4g035840) were  
316 only induced in PR11-90.

317 **Table 4. List of pea HSP and HSF related genes that were induced in response to 3 h 38°C heat treatment; numbers in the**  
 318 **table are averaged log<sub>2</sub> FC across three biological replicates.**

| Locus ID        | PR11-2 |         | PR11-90 |         | CDC Amarillo |         | Gene annotation          |
|-----------------|--------|---------|---------|---------|--------------|---------|--------------------------|
|                 | anther | stipule | anther  | stipule | anther       | stipule |                          |
| Psat0s1635g0080 | 8.8    | 8.1     | 9.0     | 8.7     | 8.2          | 8.0     | PsHSP18.1                |
| Psat2g036480    | 10.8   | 10.4    | 12.5    | 9.3     | 11.4         | 9.1     | PsHSP17.9 fragment       |
| Psat0s3930g0040 | 10.9   |         | 12.1    |         | 11.7         | 8.2     | PsHSP71.2                |
| Psat3g049640    | 2.8    |         | 2.9     | 2.3     | 2.9          | 2.3     | PsHSC71.0                |
| Psat0s3914g0040 |        |         | 2.5     |         | 2.4          |         | putative HSF             |
| Psat1g102600    | 2.0    | 3.9     | 2.1     | 4.0     |              | 5.4     | HSF B-2A-like            |
| Psat2g021040    | inf    |         | inf     | 2.4     |              |         | putative HSF             |
| Psat3g061600    | 9.3    | 7.8     | 9.7     | 7.8     |              | 7.5     | HSF A3                   |
| Psat4g086800    | inf    |         | inf     |         | inf          |         | HSF24-like               |
| Psat5g036400    | 7.7    | 7.4     | 9.2     | 8.1     | 7.1          | 7.5     | HSF A fragment           |
| Psat6g059040    | 10.1   | 6.1     | 9.8     | 6.8     | 8.7          | 6.2     | putative HSF A3          |
| Psat6g078240    |        | 5.7     |         | 5.8     |              | 6.9     | HSF A3-like protein      |
| Psat6g200480    | 5.8    | 7.1     | 7.2     | 7.9     | 5.6          | 8.1     | HSF B2A-like isoform X2  |
| Psat6g204120    |        |         |         | 3.2     |              | 2.5     | putative HSF A3          |
| Psat7g004560    |        | 2.0     |         |         |              | 2.7     | putative HSF             |
| Psat7g131680    |        |         |         |         |              | 2.4     | putative HSF             |
| Psat7g170680    |        |         |         |         |              | 3.6     | HSF A1B-like isoform X2  |
| Psat0s529g0040  | 10.1   | 10.0    | 12.5    | 9.0     | 12.6         | 9.0     | putative class I HSP20   |
| Psat2g046440    | 6.3    | 6.6     | 8.2     | 8.2     | 6.2          | 7.8     | HSP15.7 peroxisomal-like |
| Psat4g136720    | 7.3    | 7.4     | 8.1     | 8.5     | 7.0          | 7.4     | small HSP                |
| Psat5g035320    | 10.5   | 10.3    | 11.9    | 9.3     | 12.2         | 9.3     | class II HSP17.1         |
| Psat4g166400    | 10.3   | 9.9     | 12.3    | 8.9     | 13.0         | 9.5     | cytosolic class II HSP   |
| Psat5g073280    | 11.7   | 10.5    | 13.1    | 9.8     | 11.1         | 8.9     | small HSP                |
| Psat5g174800    | 9.1    | 7.4     | 11.0    | 6.9     | 8.5          | 7.1     | putative HSP20           |
| Psat6g112800    | 10.8   | 10.0    | 13.0    | 9.4     | 11.8         | 9.0     | class IV HSP22.7         |
| Psat7g114760    | 7.5    | 9.9     | 11.3    | 9.0     | 11.5         | 11.9    | class I HSP17.6          |

|                   |      |      |      |     |      |     |                                                     |
|-------------------|------|------|------|-----|------|-----|-----------------------------------------------------|
| Psat7g115480      | 7.1  | 9.0  | 7.6  | 9.3 | 6.7  | 8.4 | HSP18.1                                             |
| Psat7g211720      | 5.4  | 6.4  | 6.0  | 6.9 | 4.5  | 6.2 | class I HSP17.5                                     |
| Psat7g255520      |      | 2.8  |      | 3.2 |      | 3.6 | HSP26.5                                             |
| Psat6g238960      |      |      |      |     | 2.3  |     | DnaJ/HSP40 cysteine-rich domain protein             |
| Psat1g212880      | 7.1  | 4.9  | 8.1  | 5.7 | 7.1  | 6.5 | HSP70, mitochondrial                                |
| Psat1g222760      | 4.9  |      | 5.2  |     | 4.5  |     | Stromal HSP70                                       |
| Psat2g051360      | 8.9  | 6.5  | 10.4 | 6.6 | 8.4  | 7.2 | HSP70                                               |
| Psat3g143400      |      | 2.5  | 2.1  | 2.6 |      | 3.5 | HSP70-interacting protein                           |
| Psat3g180040      |      | 2.0  |      | 2.4 |      | 2.2 | HSC70 2-like                                        |
| Psat3g183720      | 5.1  | 5.9  | 5.4  | 6.5 | 4.6  | 6.1 | putative HSP70 family                               |
| Psat4g003160      |      |      | 2.1  |     |      |     | HSP70-interacting protein                           |
| Psat4g035840      |      |      |      | 2.2 |      |     | HSP70 8-like                                        |
| Psat4g210520      | inf  | 3.9  | 6.5  | 4.2 | 5.4  | 5.0 | HSP70                                               |
| Psat5g299000      | 3.8  | 2.9  | 4.3  | 3.1 | 3.6  | 3.8 | putative HSP70 family                               |
| Psat7g023360      | 4.5  | 4.3  | 5.2  | 4.9 | 4.5  | 4.8 | HSP70                                               |
| Psat7g218840      | 8.9  | 7.7  | 10.0 | 8.3 | 8.6  | 7.8 | HSC70 2-like                                        |
| Psat7g237280      | 4.7  | 4.4  | 5.1  | 4.9 | 4.7  | 5.3 | HSP70 nucleotide exchange factor FES1-like          |
| Psat2g006440      | 5.4  | 4.6  | 5.7  | 5.4 | 5.2  | 5.4 | HSP81-2                                             |
| Psat0ss29864g0040 | 10.8 | 10.2 | 12.1 | 9.1 | 13.0 | 9.2 | HSP83-like fragment                                 |
| Psat3g104360      | 8.5  |      | 9.9  |     | 8.3  |     | HSP83-like fragment                                 |
| Psat5g164840      | 2.6  | 2.0  | 3.0  | 2.8 | 2.5  | 2.8 | HSP80 cognate protein                               |
| Psat6g123080      | 4.2  | 3.8  | 4.7  | 4.2 | 3.9  | 4.9 | activator of HSP90 ATPase homolog 1-like            |
| Psat2g178800      | 5.0  | 3.8  | 5.5  | 4.0 | 4.9  | 4.6 | HSP70-HSP90 organizing protein 3-like               |
| Psat3g067000      | 5.2  | 3.9  | 5.7  | 4.4 | 4.9  | 5.2 | activator of HSP90 ATPase homolog 1                 |
| Psat0s3618g0080   | 2.4  | 3.4  | 3.0  | 4.0 | 2.2  | 5.2 | HSP DnaJ; putative transcription factor C2H2 family |
| Psat1g204360      | 10.3 | 10.2 | 11.7 | 9.2 | 12.5 | 9.4 | HSP DnaJ                                            |
| Psat2g037160      | 3.3  |      |      |     |      |     | HSP                                                 |
| Psat5g035280      | 10.7 | 10.4 | 12.0 | 9.4 | 10.9 | 9.2 | Class II HSP                                        |
| Psat5g229840      | 3.8  |      | 3.7  |     | 2.3  |     | Class IV HSP                                        |

|              |      |      |      |     |      |     |              |
|--------------|------|------|------|-----|------|-----|--------------|
| Psat6g021840 | 9.5  | 8.2  | 11.1 | 8.8 | 10.4 | 7.5 | Class II HSP |
| Psat7g114360 | 10.6 | 10.2 | 12.5 | 9.4 | 10.9 | 9.0 | HSP          |

319 Note: for the cells denoting ‘inf’ as FC, the reason was that their transcript at control temperature was too low to quantify. Because  
 320 their transcript at HS were significant, they were still considered as heat responsive.

321

322 A total of 220 commonly down-regulated genes in anthers among the three varieties were enriched in 18 GO terms in biological  
 323 process category and 416 consistently down-regulated genes in stipules had 16 GO terms significantly over-represented (Fig 5). Ten  
 324 GO terms overlapped between the two organ types, that is, GO:0006629 (lipid metabolic process), GO:0006869 (lipid transport),  
 325 GO:0010876 (lipid localization), GO:0044036 (cell wall macromolecule metabolic process), GO:0071554 (cell wall organization or  
 326 biogenesis), GO:0006979 (response to oxidative stress), GO:0005975 (carbohydrate metabolic process), GO:0006022 (aminoglycan  
 327 metabolic process), GO:0043086 (negative regulation of catalytic activity), and GO:0044092 (negative regulation of molecular  
 328 function). GO:0006508 (proteolysis), GO:0006468 (protein phosphorylation), GO:0015833 (peptide transport) and GO:0006857  
 329 (oligopeptide transport) were distinctly enriched in stipule down-regulated genes, whereas GO:0005976 (polysaccharide metabolic  
 330 process), GO:0010383 (cell wall polysaccharide metabolic process), GO:0042545 (cell wall medication) and GO:0071555 (cell wall  
 331 organization) were only enriched in anthers. Although more than half of the over-represented GO terms overlapped between heat  
 332 stressed pea anthers and stipules at the same flowering node, surprisingly, the gene composition relating to these biological processes  
 333 varied between the two organs. For example, three GO terms related to lipid biological processes were both down-regulated in anthers  
 334 and stipules. However, only two genes (*PsLTP1* and *PsLTP2*) for lipid transport/localization were common, and seven genes

335 (Psat1g060840, Psat1g082320, Psat1g085080, Psat2g027880, Psat3g005680, Psat5g104040, and Psat5g295040) for lipid metabolic  
 336 processes were common between the two organ types (Table 5).

337

338 **Fig 5. Significant GO terms (FDR adjusted p value at 0.01) in biological process of down-regulated genes at log2 FC <-2 in**  
 339 **anther (blue column) and stipule (orange column)**

340

341 **Table 5. Gene locus and function list of commonly down-regulated genes that are associated with lipid transport, localization**  
 342 **and metabolic process among the three pea varieties in anthers and stipules.**

| GO:0006869 lipid transport/ GO:0010876 lipid localization |                                                |                 |                                                |
|-----------------------------------------------------------|------------------------------------------------|-----------------|------------------------------------------------|
| anther                                                    |                                                | stipule         |                                                |
| locus ID                                                  | gene function                                  | locus ID        | gene function                                  |
| Psat0s1251g0040                                           | Non-specific lipid-transfer protein            | Psat0s2857g0040 | Lipid transfer protein                         |
| Psat0s4118g0160                                           | Non-specific lipid-transfer protein            | Psat1g217760    | Non-specific lipid-transfer protein            |
|                                                           |                                                |                 | Putative non-specific lipid-transfer protein   |
| Psat3g119520                                              | Non-specific lipid-transfer protein            | Psat3g097600    | AKCS9-like protein                             |
| Psat3g119560                                              | Non-specific lipid-transfer protein            | Psat5g029400    | lipid transfer protein EARLI 1-like            |
| Psat7g233960                                              | Non-specific lipid-transfer protein            | Psat5g112720    | Lipid transfer protein                         |
| Psat7g234520                                              | Non-specific lipid-transfer protein 2 (PsLTP2) | Psat6g027760    | 14 k Da proline-rich protein DC2.15-like       |
| Psat7g234640                                              | Non-specific lipid-transfer protein 2 (PsLTP2) | Psat7g226840    | Non-specific lipid-transfer protein            |
| Psat7g234720                                              | Non-specific lipid-transfer protein 3 (PsLTP1) | Psat7g228160    | Non-specific lipid-transfer protein 1 (LTP1)   |
|                                                           |                                                | Psat7g234680    | Non-specific lipid-transfer protein 2 (PsLTP2) |
|                                                           |                                                | Psat7g234720    | Non-specific lipid-transfer protein 3 (PsLTP1) |

GO:0006629 lipid metabolic process

| anther          |                                                | stipule         |                                              |
|-----------------|------------------------------------------------|-----------------|----------------------------------------------|
| locus ID        | gene function                                  | locus ID        | gene function                                |
| Psat0s1560g0040 | GDSL esterase/lipase                           | Psat0s1401g0160 | GDSL-like lipase/acyl hydrolase (EC 3.1.1.3) |
| Psat1g060840    | Pathogen-inducible alpha-dioxygenase           | Psat0s1926g0240 | Auxilin-like protein (Fragment)              |
| Psat1g081400    | uncharacterized protein LOC101505667 isoform   | Psat0s2010g0040 | GDSL-like lipase/acyl hydrolase (EC 3.1.1.3) |
| Psat1g082320    | GDSL esterase/lipase                           | Psat0s3211g0160 | GDSL esterase/lipase (Fragment)              |
| Psat1g085080    | GDSL esterase/lipase LTL1-like                 | Psat1g017360    | Fungal proteinase A                          |
| Psat1g086280    | Lipase                                         | Psat1g060840    | aspartic proteinase superfamily protein      |
| Psat1g096440    | 3-ketoacyl-CoA synthase-like protein           | Psat1g082320    | Pathogen-inducible alpha-dioxygenase         |
| Psat1g200800    | GDSL-like lipase/acyl hydrolase (EC 3.1.1.3)   | Psat1g085080    | GDSL esterase/lipase                         |
| Psat2g027880    | Uncharacterized protein                        | Psat1g193000    | GDSL esterase/lipase LTL1-like               |
| Psat3g005680    | GDSL-like lipase/acyl hydrolase (EC 3.1.1.3)   | Psat2g027800    | GDSL-like lipase/acyl hydrolase (EC 3.1.1.3) |
| Psat3g006280    | GDSL esterase/lipase                           | Psat2g027880    | GDSL-like lipase/acyl hydrolase (EC 3.1.1.3) |
| Psat5g104040    | GDSL esterase/lipase At2g04570-like            | Psat2g083600    | Uncharacterized protein                      |
| Psat5g284160    | 3-ketoacyl-CoA synthase (EC 2.3.1.-)           | Psat2g083600    | 3-ketoacyl-CoA synthase (EC 2.3.1.-)         |
| Psat5g295040    | GDSL esterase/lipase apg-like protein          | Psat2g132440    | PI-PLC X domain-containing protein           |
| Psat6g041080    | GDSL-like lipase/acyl hydrolase                | Psat3g000920    | At5g67130                                    |
| Psat6g184320    | Patatin (EC 3.1.1.-)                           | Psat3g005640    | 3-ketoacyl-CoA synthase (EC 2.3.1.-)         |
| Psat7g066400    | GDSL esterase/lipase                           | Psat3g005680    | GDSL-like lipase/acyl hydrolase (EC 3.1.1.3) |
| Psat7g066440    | GDSL-like lipase/acyl hydrolase                | Psat3g010160    | GDSL-like lipase/acyl hydrolase (EC 3.1.1.3) |
| Psat7g066520    | GDSL-like lipase/acyl hydrolase                | Psat4g010320    | Uncharacterized protein                      |
| Psat7g125680    | PLC-like phosphodiesterase superfamily protein | Psat4g010320    | Fatty acid hydroxylase protein (EC 4.1.99.5) |
|                 |                                                | Psat4g020480    | cyprosin-like                                |
|                 |                                                | Psat4g190160    | Phospholipase D alpha                        |
|                 |                                                | Psat4g196720    | GDSL esterase/lipase apg-like protein        |
|                 |                                                | Psat5g104040    | GDSL esterase/lipase At2g04570-like          |
|                 |                                                | Psat5g177200    | GDSL-like lipase/acyl hydrolase (EC 3.1.1.3) |
|                 |                                                | Psat5g295040    | GDSL esterase/lipase apg-like protein        |
|                 |                                                | Psat6g002160    | GDSL-like lipase/acyl hydrolase              |
|                 |                                                | Psat6g002160    | GDSL-like lipase/acyl hydrolase (EC          |
|                 |                                                | Psat7g059400    | 3.2.1.51)                                    |

343 **Note:** for the genes in the list, their transcription level between heat treatment and control temperature was at log2 FC <-2.

344 We arbitrarily filtered the DEGs of each variety within the top 20% fold threshold range to  
345 further characterize a list of genes whose functions were most inhibited in heat stress. In anthers,  
346 35 genes were shared among the three varieties, among which seven genes were involved in  
347 pectin metabolism, and three with lipid metabolism. Pectin, a polysaccharide polymer of  
348 galacturonic acid with different degrees of esterification via an  $\alpha$ -1, 4-glycosidic bond, is a  
349 primary composition in the plant cell wall and cell interlayer. In stipules, 51 genes were common  
350 among the three varieties. The functions of these genes seemed various, including four lipase  
351 genes. Only one gene at locus Psat3g196040 was present in both lists.

## 352 **GO analysis on variety-dependant DEGs**

353 To compare heat response among the three pea varieties, individual GO enrichment analyses  
354 were performed on the distinct DEGs of each variety, which were exclusive DEGs from the  
355 varieties' common DEGs in individual variety DEG list. Among the three varieties, PR11-2 had  
356 the lowest number of enriched GO terms in down-regulated genes and the highest number of  
357 over-representative GO terms in up-regulated genes of both anthers and stipules, implying that  
358 PR11-2 is likely to have a superior heat tolerance compared to the other two varieties (Fig 6). In  
359 the anther transcriptome of PR11-2, no GO term was significantly enriched for down-regulated  
360 DEGs but 13 terms were up-regulated. These terms corresponded to four biological pathways,  
361 i.e., cell respiratory electron transport chain (GO:0022904), cell wall lignin metabolic and  
362 catabolic process (GO:0009808, GO:0046274), oxidation-reduction process (GO:0055114), and  
363 cellular modified amino acid catabolic process (GO:0042219). In contrast, the up-regulated GO  
364 terms in its stipule were related to regulation of transcription (GO:0006355), DNA repair  
365 (GO:0006281), and response to hormone (GO:0009725).

366 PR11-90 (heat susceptible) had none and two GOs significantly up-regulated in anthers and  
367 stipules, respectively; whereas four and 39 GO terms were down-regulated in anther and stipule.  
368 The two up-regulated terms corresponded with response to water (GO:0009415). The four anther  
369 down-regulated terms were associated with amide transport (GO:0042886), oligopeptide  
370 transport (GO:0006857) and oxidation-reduction process. And the 39 GOs with down-regulation  
371 in stipule included 19 terms in the cluster of nucleosome assembly (GO:0006334), two terms in  
372 microtubule-based movement (GO:0007018) and response to auxin (GO:0009733) that were  
373 only over-representative in PR11-90. These distinctly heat prohibited processes in PR11-90 were  
374 predicted to link with its heat susceptible property.

375 In both anther and stipule transcriptomes of CDC Amarillo, the number of down-regulated GO  
376 terms was also greater than that of GO terms with up-regulation (29/12  
377 downregulation/upregulation in anther; 46/9 downregulation/upregulation in stipule) and had the  
378 highest total number of GOs in both anthers and stipules among the three pea varieties. This  
379 differential of heat responsive GO among the three varieties demonstrated the genetic variation  
380 of field pea in heat response and shed a light in deciphering molecular mechanism involved in  
381 pea heat response and heat tolerance. In anthers, the significantly enriched GO terms in  
382 transcriptionally inhibited genes consisted of many GOs in the cluster ATP biosynthetic  
383 (GO:0006754) and metabolic (GO:0046034) process, which was uniquely observed in CDC  
384 Amarillo. The 12 enriched terms of genes, whose expression was induced, were associated with  
385 rRNA processing (GO:0006364), response to zinc ion (GO:0010043), electron transport chain  
386 (GO:0022900) and carbon utilization (GO:0015976). rRNA processing was also up-regulated in  
387 stipule in addition to cellular response to DNA damage stimulus (GO:0006974) and protein  
388 folding (GO:0006457). The stipule down-regulated GO terms were mainly linked with amino



389 acid transport (GO:00068650), cell wall polysaccharide metabolic process (GO:0010383), lignin  
390 metabolic and catabolic process, lipid transport (GO:0006869), lipid localization (GO:0010876),  
391 lipid metabolic process (GO:0006629) and protein phosphorylation (GO:0006468).

392 In stipules, 7 GO terms were down-regulated in all three varieties and were involved in apoptotic  
393 process (GO:0006915), defense response (GO:0006952) cell wall macromolecule metabolic  
394 process (GO:0044036) and polysaccharide metabolic process (GO:0005976). Cell wall  
395 polysaccharide metabolic process, plant-type cell wall organization (GO:0009664),  
396 photosynthesis, light harvesting (GO:0009765), amine transport (GO:0015837) and aminoglycan  
397 metabolic process (GO:0006022) were down-regulated in PR11-90 and CDC Amarillo. Lipid  
398 transport and localization were down-regulated in PR11-2 and CDC Amarillo. It is noted that  
399 cellular response to stress (GO:0033554) and cellular response to DNA damage stimulus  
400 (GO:0006974) was only up-regulated in the stipules of two heat-tolerant varieties, PR11-2 and  
401 CDC Amarillo. Comparing the between the two varieties, transcripts of four genome loci were  
402 common, which were Psat2g148040, Psat5g135640, Psat6g105320 and Psat6g199840. In  
403 anthers, generation of precursor metabolites and energy (GO:0006091) and electron transport  
404 chain (GO:0022900) were only up-regulated in PR11-2 and CDC Amarillo as well, and the  
405 transcriptional level of three relating genes (Psat1g132320, Psat1g132440, and Psat6g041400)  
406 was induced in both varieties. Interestingly, contrasting response was observed in oxidation-  
407 reduction process (GO:0055114) among the anthers' transcriptomes of the three varieties. This  
408 biological process was enriched in the up-regulated genes in PR11-2, but significant in the down-  
409 regulated genes in PR11-90 and were over-representative in both down/up-regulated genes in  
410 CDC Amarillo. Among these genes, 8 genes were commonly up-regulated in PR11-2 and CDC  
411 Amarillo, 28 genes were down-regulated in CDC Amarillo and PR11-90 (S2 Table).

412 **Fig 6. Enriched GO terms in biological processes of variety distinct DEGs in anthers and**  
413 **stipules. Red color are up-regulated processes, and blue color is down-regulated processes.**  
414 **More intense color means greater significance.** Up-regulated biological process is colored in  
415 red, red scale for significance p value is shown as follows,   $0.01 \leq p < 0.001$    
416  $0.001 \leq p < 0.0001$    $\leq 0.0001$ . Down-regulated biological process is colored in blue, blue  
417 scale for significance p value is shown as follows,   $0.01 \leq p < 0.001$ ,   
418  $0.001 \leq p < 0.0001$ ,   $\leq 0.0001$ .

## 419 **Discussion**

### 420 **General and genotype specific heat response at cellular level**

421 Separate heat responsive genes of individual variety were identified at  $\log_2$  FC >2 for anther and  
422 stipules, and two heat tolerant varieties in our study demonstrated different transcriptomic  
423 response, i.e., PR11-2 had the lowest number of DEGs among the three varieties, contrastingly  
424 DEG number in CDC Amarillo was the greatest. This was also seen in maize, where tolerant  
425 cultivar S058 and L043 had the most and least abundant DEGs among four tolerant and four  
426 susceptible varieties, respectively [16]. Collectively, it is suggested that plant heat tolerance  
427 could be achieve in different mechanism.

428 Individual GO enrichment analysis was carried out on common DEGs among the three varieties  
429 and variety unique DEGs, aiming to characterize the general heat response in biological  
430 processes of pea plant as well as unique responses relating to heat tolerance. Response to heat  
431 (GO:0009408), protein folding (GO: 0006457) and transcription, DNA-templated (GO:0006351  
432 and GO:0051252) were commonly upregulated between stipules and anthers (Fig 4). The

433 transcriptome re-program and chaperone function of HSPs are considered to contribute to plant's  
434 basal thermo-tolerance [41]. Regressed biological processes were mainly related to lipid  
435 transport, lipid metabolic process and cell wall macromolecule metabolic process, and their  
436 relevance to HS and relating genes are further discussed in latter section.

437 Regarding variety unique heat response, anther of PR11-2 had only up-regulated processes,  
438 belonging to three biological process clusters, i.e., respiratory electron transport chain, lignin  
439 catabolic process and cellular modified amino acid catabolic process (Fig 6). PR11-90 had none  
440 induced biological process in anther. This could partly explain heat tolerance of PR11-2 over  
441 PR11-90. Intriguingly, electron transport chain (ETC) was also upregulated in CDC Amarillo. In  
442 electron transport chain, Psat1g132320 and 6g041400 encoding mitochondrial cytochrome b and  
443 Psat1g132440 encoding uncharacterized protein were upregulated. Cytochrome b-c1 complex is  
444 an essential component of the mitochondrial ETC. Chilling induced accumulation of reactive  
445 oxygen species resulting from over-reduction of ETC led to oxidative stress [42].

446 In stipules, cellular response to DNA damage stimulus was only induced in two heat tolerant  
447 varieties. Four genes were common between gene lists of the two varieties, which were  
448 2g148040 (DNA mismatch repair protein MLH3), 5g135640 (DNA excision repair protein),  
449 6g105320 (cryptochrome 2b), and 6g199840 (DNA mismatch repair protein MSH3). The  
450 putative functions of the four genes were involved with three DNA repair pathways, but these  
451 pathways were well studied in UV light induced stress [43]. Elucidation on the connection of the  
452 plant DNA repair to abiotic stress responses remains scarce, plant's ability to maintain its  
453 genome integrity is likely to play a role in stress tolerance [44].

## 454 **Regulatory importance of HSFA3 and HSF2 in heat response**

455 Although HSFs are believed to play a central regulation role in the transcriptional induction of  
456 downstream HS responsive genes, HSFs display their variation in HS response in terms of  
457 induction fold threshold and regulation, and thereby could affect various gene expression  
458 induction. Structurally plant HSFs are classified into three classes, namely, HSF A, B, and C,  
459 based on their structural peculiarities. The best characterized HSF gene family in plants has been  
460 firstly reported in Arabidopsis (21 HSF genes) [9]. Wheat (56 HSF genes) [45]; and soybean (52  
461 HSF genes) [46] were reported to have the largest families in monocot and dicot crops,  
462 respectively. Among the three classes, the function of HSFA3 was more clearly elucidated, and  
463 here is broad agreement that their role most directly leads to heat-induced activation of heat  
464 shock genes. HSFA3s are predicted to be the “master regulators” that have the direct role in the  
465 activation of transcriptional networks. Knockdown of HSFA3 genes in Arabidopsis led to a  
466 reduced induction of many HS-responsive genes, as a result plants demonstrated HS susceptible  
467 phenotypes [47, 48]. The thermo-tolerance conferred by Arabidopsis HSFA3d was further  
468 confirmed in a recent study in pea [49], where transformant pea plants with this Arabidopsis HSF  
469 was more heat tolerant than its wild type due to the increased antioxidant enzyme activity and  
470 reduced hydrogen peroxide. Another study in Arabidopsis concluded that HSFA3 was also an  
471 important HS-responsive TF, because knockout or knockdown mutation of HSFA3 resulted in  
472 reduced expression of putative target HSP genes during HS [50]. OsHSFA3 and A2s were  
473 identified to responsive in rice panicle when exposed to multiple hours of HS [51]. In  
474 comparison, in common wheat (*Triticum aestivum* L.), HSFA2 and A6 had the highest  
475 transcriptional induction among 56 TaHSF members when subjected to HS, which revealed the  
476 regulatory importance of these two subclasses during HS [45]. Among legume plants, over-

477 expression of soybean *GmHSFA1* could enhance the thermotolerance of transgenic soybeans via  
478 the activation of various HSP gene expression [52]. In the other study, the induction of GmHSFs  
479 at HS was found to variate at different plant stages, including HSFA1 [53]. In *Lotus japonicus*,  
480 HSFA1 did not dominantly express in heat-stressed seedlings, A2, A3, A6, A7, B2 and B5 were  
481 exclusively heat induced and other hsf subclasses could also be involved in other abiotic stress  
482 responses [54]. Q-PCR expression analysis of chickpea HSFs under heat stress at pod  
483 development and at 15 days old seedling stage showed that CarHSFA2, A6, and B2 were  
484 constitutively up-regulated at both plant development stages indicating their importance in the  
485 regulatory network relative to HS [55]. In the present study, various transcripts of putative pea  
486 HSFs were characterized that were responsive to 3h heat treatment, among which putative HSFA  
487 stood out in its amount abundance, the A3 subclass in particular. Three HSFA transcripts  
488 (Psat3g061600, Psat5g036400 and Psat6g059040) were highlighted because their transcriptional  
489 levels were dominantly increased in both anthers and stipules in all three varieties (Table 4),  
490 suggesting they are essential transcriptional regulators in pea HS response. Further analysis on  
491 knock-out mutants of these HSF genes will validate their exact role, whether directly or not, in  
492 heat regulation. Interesting, individual HSF were identified for anthers and stipules, indicating  
493 different regulatory networks may exist between vegetative and reproductive organs.

494 Functions and molecular mechanism of HSFs were less elucidated, but they were found to  
495 interact closely with HSFA in plant's HS response. The role of HSFs were reported either as a  
496 repressor or activator in the transcription of HSFA depending on plant species, as a result, they  
497 participated in different mechanisms in HS regulation. In *A. thaliana*, HSFs suppressed the  
498 transcriptional activities of HS-inducible HSFs, including HSFA2, A7a, at both normal  
499 temperature environment and HS condition [56]. On the contrary, the function of tomato's

500 HSFB1 seemed more complex, it could work either as a co-activator of some HSFs e.g.,  
501 HSFA1a or as a transcription repressor of other HSFs such as HSFA1b and HSFA2([57-59]. In  
502 our result, transcription levels of two putative HSFB2 genes (Psat1g102600 and Psat6g200480)  
503 were highly heat induced along with HSFA genes independent of organ types and genotypes,  
504 implying their positive role in transcriptional regulation of field pea in HS, which was in  
505 agreement with the finding in chickpea [55]. It seemed that the role of HSFB in legume crops  
506 was similar to the coactivator characteristics of tomato HSFB.

## 507 **Transcriptional induction of various pea sHSPs and HSP70 at HS**

508 In plant cellular defense against HS, the induction of HSP is one of the major responses. HSPs  
509 act as molecular chaperones which are proteins that facilitate folding of other functional proteins  
510 especially at the secondary and tertiary structure and prevent them from denaturation and  
511 aggregation during exposure to HS. Depending on the molecular size, HSPs are divided into five  
512 conserved classes: small HSPs (sHSPs), HSP60, HSP70, HSP90 and HSP100.  
513 sHSPs range in size from 10 to 42 kDa and share a conserved C-terminal domain that is common  
514 to all eukaryotic organisms. Generally, sHSP functions as a molecular chaperone and protects the  
515 substrate proteins against thermal aggregation or denaturation. In six legume species, more than  
516 5 different sHSPs were detected from plant tissues exposed to HS [60]. In pea, several sHSPs  
517 belonging to two classes based on their sequence alignment and immunological cross-reactivity  
518 were isolated. *PsHSP 17.7, 17.9, 18.1* were located in the cytoplasm, whereas *PsHSP 21 and*  
519 *PsHSP 22* were located in chloroplasts and mitochondria, respectively ([19, 20, 61]. From these  
520 reports, we could conclude that they were all involved in establishing cellular thermotolerance to  
521 some degree, though the induction of their expression was triggered at different temperatures.

522 Transcriptome profiling in our experiment revealed that the transcriptional levels of cytoplasmic  
523 sHSPs were drastically increased at HS among the three pea varieties (Table 4), which was in  
524 agreement with the above-mentioned result on other pea genotypes, suggesting the function of  
525 these sHSPs is general in field pea plant. Beyond that, transcriptional response of other sHSPs in  
526 relation to HS were also characterized, which provides a more comprehensive picture of sHSP  
527 heat response in pea.

528 HSP70 proteins have also been extensively studied; they are ATP-driven molecular chaperones  
529 with an N-terminal ATPase domain and a C-terminal peptide binding domain. Similar to the  
530 gene family encoding sHSPs, HSP70 genes also encode proteins targeted to different cellular  
531 compartments, including mitochondria, chloroplast, endoplasmic reticulum, and the cytoplasm.  
532 Similarly, HSPs isolated in pea differed in their expression under different temperature  
533 environments, inferring functional differences between heat-induced and constitutively  
534 expressed HSP 70 homologues. In our study we confirmed the significance of various HSP70  
535 genes in field pea heat response.

## 536 **HS response in pea cell wall**

537 Various biological processes relating to cell wall were significantly down-regulated when  
538 exposed to HS in our study, which helped decipher the molecular mechanism of heat damage on  
539 pea cell wall (Fig 5 & 6). Similar in heat stressed lentil, a major group of heat responsive genes  
540 were involved in plasma membrane and cell wall [18].

541 Plant cell walls have multiple layers and are made up of three sections, i.e., the middle lamella,  
542 primary cell wall, and secondary cell wall. The primary wall surrounds growing cells or cells  
543 capable of cell growth and its plasticity is essential for cell expansion and growth; whereas the

544 secondary wall is a highly specialized and thickened structure to provide the sufficient rigidity,  
545 which undergoes irreversible changes in many fully developed cells. The middle lamella is a  
546 pectin layer to provide necessary adhesive between two adjoining cells [62]. Pectin, a mixture of  
547 polysaccharides, is also a major composition in primary cell wall, especially in dicotyledonous  
548 plants [63]. In addition to its adhesive property, adjustment of its content in cell wall is proposed  
549 to link with various physiological function during plant life cycle as well as contribute to signal  
550 transduction to various conditions. Reproductive tissues are particularly rich in pectin compared  
551 with other tissues, for example pectin constituted ~40% and 15% in rice pistil and anther cell  
552 wall, respectively, whereas the proportion of pectin was only 5% in the cell wall of mature leaf  
553 [64]. Transcriptome comparison of this study between HS and normal temperature characterized  
554 a cluster of genes encoding pectin esterase (enzymes for pectin metabolism), only heat  
555 responsive in anthers of all three varieties, not in stipule, and it is proposed to be associated with  
556 contrasting pectin composition between reproductive organ and vegetative plant organ. The  
557 reduced expression of pectin methyl esterase (PME; EC 3.1.1.11) genes under HS was consistent  
558 with the finding in canola [17]. Intriguingly, recent studies in pea aluminum stress and cold  
559 stress suggested that the degree of pectin methyl-esterification and PME activity could also play  
560 a role in both abiotic stresses [65, 66]. Still, the stress effect on the architecture of cell wall  
561 remodeling by PME activity may depend on the plant species, genotype, and growth stage, and  
562 also rely on the intensity and timing of the stress [62].

563 Lignin is a major composition in secondary cell wall and provides cell structural rigidity. Its  
564 biosynthesis consists of a very complicated network, where cinnamyl alcohol dehydrogenase  
565 (CAD), laccase (LAC) and peroxidase are involved. In *A.thaliana*, CAD function defective  
566 mutant displayed inhibited plant and male sterile compared with wild type, likely attributed to



567 the abnormally reduced lignin biosynthesis in the anther [67]. Likewise, CAD1 mutant of *M.*  
568 *truncatula* had a much lower lignin content than the wild type, though causing no growth  
569 difference between two materials at normal temperature environment (22°C), the growth of this  
570 *MtCAD1* mutant was significantly suppressed at 30°C [68]. In our study, lignin metabolic and  
571 catabolic process was identified to be uniquely up-regulated in the anther's transcriptome of heat  
572 tolerant variety, PR11-2, when exposed to HS (Fig 6). The genes in this process were identified  
573 to be LAC encoding genes on pea chromosome II, III, V and VII, which are predicted to be  
574 associated with heat tolerance. In Anadiplois, functions of LAC 1, 4 and 17 were linked with  
575 anther dehiscence success [69]. A QTL was identified for HS susceptibility index of percent  
576 spikelet sterility in rice on chromosome XII, and one LAC gene was included in this QTL  
577 interval [70].

## 578 **Effects of HS on Lipid Transport and Metabolism**

579 HS in our study adversely affected lipid transport and localization in both pea anther and stipule  
580 independent of genotypes (Fig 5). The lipid process was inhibited mainly via the down-  
581 regulation of various transcripts encoding non-specific lipid transfer proteins (LTPs; Table 5).  
582 Plant LTPs are broadly categorized into LTP1 and LTP2 groups based on the molecular weights.  
583 LTP1s generally consist of 90 amino acids, whereas LTP2s have around 70 amino acids.  
584 Although the biological functions of LTP have not been clear yet, previous studies suggested that  
585 LTPs genes can be divided into three groups depending on expression patterns of the related  
586 genes, that is, 1) genes only expressed in aerial plant parts; 2) genes only expressed in root; and  
587 3) genes whose expression was restricted in reproductive tissues [71]. Our results added another  
588 piece of evidence to support tissue-specific expression of LTP genes, because different  
589 transcripts of LTP genes were characterized between field pea anther and stipule at normal

590 development as well as at HS condition. Except that the two genes encoding *PsLTP1* & 2,  
591 previously isolated in pea seeds [72], were heat responsive in both plant samples, other  
592 corresponding genes variated. To the authors' knowledge, our work is the first to report the link  
593 between LTP genes with pea normal plant development and heat response, and their biological  
594 functions are worth being validated via mutation experiment. In wheat, *LTP3* accumulation was  
595 detected in cell membrane after HS at plant seedling and grain-filling stages, what's more, in  
596 transgenic Arabidopsis seedling with the overexpression of *TaLTP3* was better tolerant to HS  
597 than control plants, possibly because of a less membrane injury [73].

598 In addition, the lipid metabolic process was negatively damaged by HS in both anther and stipule  
599 among all three pea varieties (Fig 5), which was also seen in rice heat stressed anther [15]. The  
600 damage was mostly due to that the transcriptional activity of multiple genes associated with  
601 GDSL lipase were adversely affected, although GDSL gene family was differentially expressed  
602 between anther and stipule (Table 5). Studies in this aspect are scarce in legume including pea. In  
603 the model plant *A. thaliana*, GDSL lipase gene has a family of 108 gene members, which are  
604 distributed across plant genome [74, 75]. Among them, 20 members were expressed in all  
605 tissues, and the other 16 and five members were exclusively expressed in flower and root,  
606 respectively. [Mayfield et al. \(2001\)](#) reported one GDSL lipase to be involved in the formation of  
607 pollen coat [76]. With the advance in omics technology, the integration of lipidome and  
608 transcriptome provides a new perspective of studying HS as shown in [77][Higashi et al. \(2015\)](#).

## 609 **Coincidence of Heat Responsive Genes among Field Pea Studies**

610 Attempts in genomic understanding of pea HS and selecting for heat tolerant varieties have  
611 started since last decade ago, benefiting from the rapid advancement in sequencing technology.

612 However, results from individual research can not all be compared because the types of genetic  
613 markers applied were various. Our characterized heat responsive genes can be compared with a  
614 recent association mapping study[8] by Tafesse et al. (2020), as pea genome locus markers were  
615 used in their work. Twelve DEGs in our study coincided with putative candidate genes for heat  
616 responsive trait characterized in the field condition from their work (S3 Table). The response of  
617 these 12 genes fell into three patterns: 1) responsive in all tissue types among the three varieties  
618 (e.g. Psat5g303760 encoding uncharacterized protein); 2) specifically responsive to tissue type  
619 (e.g. Psat2g144160 encoding pectin acetyltransferase); 3) only responsive in certain genotype (e.g.  
620 Psat2g166520 encoding putative rapid alkalization factor). Further functional annotation of  
621 individual gene would benefit to explicit its role in HS response.

## 622 **Conclusions**

623 Our research profiles a global transcriptome response to short term HS among different field pea  
624 varieties. Common effects of HS in biological processes are shared between anthers  
625 (reproductive organ) and stipules on the same flowering node (vegetative organ), though the  
626 involved genes in certain processes differed between the two organs (e.g., lipid transport and  
627 metabolic process). Distinct heat responses were characterized on individual pea varieties, which  
628 provides insight into molecular mechanisms of heat-tolerance response. This research supports  
629 the utilization of RNA-Seq for the identification of heat responsive genes, provides preliminary  
630 result for marker assisted selection, and is proposed to be applicable in other abiotic stress  
631 studies of pea.

## 632 **Acknowledgements**

633 We thank Dr. Arthur Davis at Department of Biology, University of Saskatchewan, for his  
634 advice in the experimental design.

635

## 636 **References**

- 637 1. Hoegh-Guldberg O, Jacob D, Bindi M, Brown S, Camilloni I, Diedhiou A, et al. Impacts  
638 of 1.5 C global warming on natural and human systems. Global warming of 15 C An IPCC  
639 Special Report. 2018.
- 640 2. Lobell DB, Field CB. Global scale climate–crop yield relationships and the impacts of  
641 recent warming. *Environmental research letters*. 2007;2(1):014002.
- 642 3. Bueckert RA, Wagenhoffer S, Hnatowich G, Warkentin TD. Effect of heat and  
643 precipitation on pea yield and reproductive performance in the field. *Canadian journal of plant  
644 science*. 2015;95(4):629-39.
- 645 4. Huang S, Gali KK, Tar’an B, Warkentin TD, Bueckert RA. Pea phenology: crop potential  
646 in a warming environment. *Crop Science*. 2017;57(3):1540-51.
- 647 5. Jiang Y, Lahlali R, Karunakaran C, Kumar S, Davis AR, Bueckert RA. Seed set, pollen  
648 morphology and pollen surface composition response to heat stress in field pea. *Plant, cell &  
649 environment*. 2015;38(11):2387-97.
- 650 6. Jiang Y, Lahlali R, Karunakaran C, Warkentin TD, Davis AR, Bueckert RA. Pollen,  
651 ovules, and pollination in pea: Success, failure, and resilience in heat. *Plant, cell & environment*.  
652 2019;42(1):354-72.
- 653 7. Tafesse EG, Warkentin TD, Bueckert RA. Canopy architecture and leaf type as traits of  
654 heat resistance in pea. *Field Crops Research*. 2019;241:107561.
- 655 8. Tafesse EG, Gali KK, Lachagari V, Bueckert R, Warkentin TD. Genome-wide  
656 association mapping for heat stress responsive traits in field pea. *International journal of  
657 molecular sciences*. 2020;21(6):2043.
- 658 9. Nover L, Bharti K, Döring P, Mishra SK, Ganguli A, Scharf K-D. Arabidopsis and the  
659 heat stress transcription factor world: how many heat stress transcription factors do we need?  
660 *Cell stress & chaperones*. 2001;6(3):177.
- 661 10. Scharf K-D, Siddique M, Vierling E. The expanding family of Arabidopsis thaliana small  
662 heat stress proteins and a new family of proteins containing  $\alpha$ -crystallin domains (Acd proteins).  
663 *Cell stress & chaperones*. 2001;6(3):225.
- 664 11. Lin B-L, Wang J-S, Liu H-C, Chen R-W, Meyer Y, Barakat A, et al. Genomic analysis of  
665 the Hsp70 superfamily in Arabidopsis thaliana. *Cell stress & chaperones*. 2001;6(3):201.
- 666 12. Krishna P, Gloor G. The Hsp90 family of proteins in Arabidopsis thaliana. *Cell stress &  
667 chaperones*. 2001;6(3):238.
- 668 13. Agarwal M, Katiyar-Agarwal S, Sahi C, Gallie DR, Grover A. Arabidopsis thaliana  
669 Hsp100 proteins: kith and kin. *Cell stress & chaperones*. 2001;6(3):219.

- 670 14. Swindell WR, Huebner M, Weber AP. Transcriptional profiling of Arabidopsis heat  
671 shock proteins and transcription factors reveals extensive overlap between heat and non-heat  
672 stress response pathways. *BMC genomics*. 2007;8(1):125.
- 673 15. Endo M, Tsuchiya T, Hamada K, Kawamura S, Yano K, Ohshima M, et al. High  
674 temperatures cause male sterility in rice plants with transcriptional alterations during pollen  
675 development. *Plant and Cell Physiology*. 2009;50(11):1911-22.
- 676 16. Frey FP, Urbany C, Hüttel B, Reinhardt R, Stich B. Genome-wide expression profiling  
677 and phenotypic evaluation of European maize inbreds at seedling stage in response to heat stress.  
678 *BMC genomics*. 2015;16(1):123.
- 679 17. Yu E, Fan C, Yang Q, Li X, Wan B, Dong Y, et al. Identification of heat responsive  
680 genes in Brassica napus siliques at the seed-filling stage through transcriptional profiling. *PLoS*  
681 *One*. 2014;9(7):e101914.
- 682 18. Singh D, Singh CK, Taunk J, Jadon V, Pal M, Gaikwad K. Genome wide transcriptome  
683 analysis reveals vital role of heat responsive genes in regulatory mechanisms of lentil (*Lens*  
684 *culinaris* Medikus). *Scientific reports*. 2019;9(1):1-19.
- 685 19. DeRocher AE, Helm KW, Lauzon LM, Vierling E. Expression of a conserved family of  
686 cytoplasmic low molecular weight heat shock proteins during heat stress and recovery. *Plant*  
687 *Physiology*. 1991;96(4):1038-47.
- 688 20. DeRocher A, Vierling E. Cytoplasmic HSP70 homologues of pea: differential expression  
689 in vegetative and embryonic organs. *Plant molecular biology*. 1995;27(3):441-56.
- 690 21. Srikanthbabu V, Krishnaprasad BT, Gopalakrishna R, Savitha M, Udayakumar M.  
691 Identification of pea genotypes with enhanced thermotolerance using temperature induction  
692 response technique (TIR). *Journal of Plant Physiology*. 2002;159(5):535-45.
- 693 22. Franssen SU, Shrestha RP, Bräutigam A, Bornberg-Bauer E, Weber AP. Comprehensive  
694 transcriptome analysis of the highly complex *Pisum sativum* genome using next generation  
695 sequencing. *BMC genomics*. 2011;12(1):227.
- 696 23. Sudheesh S, Sawbridge TI, Cogan NO, Kennedy P, Forster JW, Kaur S. De novo  
697 assembly and characterisation of the field pea transcriptome using RNA-Seq. *BMC genomics*.  
698 2015;16(1):611.
- 699 24. Chen H, Osuna D, Colville L, Lorenzo O, Graeber K, Kuester H, et al. Transcriptome-  
700 wide mapping of pea seed ageing reveals a pivotal role for genes related to oxidative stress and  
701 programmed cell death. *PloS one*. 2013;8(10).
- 702 25. Alves-Carvalho S, Aubert G, Carrère S, Cruaud C, Brochot AL, Jacquin F, et al. Full-  
703 length de novo assembly of RNA-seq data in pea (*Pisum sativum* L.) provides a gene expression  
704 atlas and gives insights into root nodulation in this species. *The Plant Journal*. 2015;84(1):1-19.
- 705 26. Zaman MSU, Malik AI, Erskine W, Kaur P. Changes in gene expression during  
706 germination reveal pea genotypes with either “quiescence” or “escape” mechanisms of  
707 waterlogging tolerance. *Plant, Cell & Environment*. 2019;42(1):245-58.
- 708 27. Henriët C, Aimé D, Térézol M, Kilandamoko A, Rossin N, Combes-Soia L, et al. Water  
709 stress combined with sulfur deficiency in pea affects yield components but mitigates the effect of  
710 deficiency on seed globulin composition. *Journal of experimental botany*. 2019;70(16):4287-304.
- 711 28. Warkentin T, Vandenberg A, Tar’an B, Barlow S, Ife S. CDC Centennial field pea.  
712 *Canadian journal of plant science*. 2007;87(4):907-8.
- 713 29. Warkentin T, Vandenberg A, Banniza S, Barlow B, Ife S. CDC Sage field pea. *Canadian*  
714 *journal of plant science*. 2006;86(1):161-2.

- 715 30. Warkentin T, Vandenberg A, Tar'an B, Banniza S, Arganosa G, Barlow B, et al. CDC  
716 Amarillo yellow field pea. *Canadian journal of plant science*. 2014;94(8):1539-41.
- 717 31. Schubert M, Lindgreen S, Orlando L. AdapterRemoval v2: rapid adapter trimming,  
718 identification, and read merging. *BMC research notes*. 2016;9(1):88.
- 719 32. Quast C, Pruesse E, Yilmaz P, Gerken J, Schweer T, Yarza P, et al. The SILVA  
720 ribosomal RNA gene database project: improved data processing and web-based tools. *Nucleic  
721 acids research*. 2012;41(D1):D590-D6.
- 722 33. Langmead B, Salzberg SL. Fast gapped-read alignment with Bowtie 2. *Nature methods*.  
723 2012;9(4):357.
- 724 34. Kreplak J, Madoui M-A, Cápál P, Novak P, Labadie K, Aubert G, et al. A reference  
725 genome for pea provides insight into legume genome evolution. *Nature genetics*.  
726 2019;51(9):1411-22.
- 727 35. Dobin A, Davis CA, Schlesinger F, Drenkow J, Zaleski C, Jha S, et al. STAR: ultrafast  
728 universal RNA-seq aligner. *Bioinformatics*. 2013;29(1):15-21.
- 729 36. Consortium U. UniProt: a worldwide hub of protein knowledge. *Nucleic acids research*.  
730 2019;47(D1):D506-D15.
- 731 37. Buchfink B, Xie C, Huson DH. Fast and sensitive protein alignment using DIAMOND.  
732 *Nature methods*. 2015;12(1):59.
- 733 38. Trapnell C, Roberts A, Goff L, Pertea G, Kim D, Kelley DR, et al. Differential gene and  
734 transcript expression analysis of RNA-seq experiments with TopHat and Cufflinks. *Nature  
735 protocols*. 2012;7(3):562-78.
- 736 39. Schmittgen TD, Livak KJ. Analyzing real-time PCR data by the comparative C T  
737 method. *Nature protocols*. 2008;3(6):1101.
- 738 40. Tian T, Liu Y, Yan H, You Q, Yi X, Du Z, et al. agriGO v2. 0: a GO analysis toolkit for  
739 the agricultural community, 2017 update. *Nucleic acids research*. 2017;45(W1):W122-W9.
- 740 41. Fragkostefanakis S, Röth S, Schleiff E, SCHARF KD. Prospects of engineering  
741 thermotolerance in crops through modulation of heat stress transcription factor and heat shock  
742 protein networks. *Plant, cell & environment*. 2015;38(9):1881-95.
- 743 42. Hu W, Song X, Shi K, Xia X, Zhou Y, Yu J. Changes in electron transport, superoxide  
744 dismutase and ascorbate peroxidase isoenzymes in chloroplasts and mitochondria of cucumber  
745 leaves as influenced by chilling. *Photosynthetica*. 2008;46(4):581.
- 746 43. Manova V, Gruszka D. DNA damage and repair in plants—from models to crops.  
747 *Frontiers in plant science*. 2015;6:885.
- 748 44. Nisa M-U, Huang Y, Benhamed M, Raynaud C. The plant DNA damage response:  
749 Signaling pathways leading to growth inhibition and putative role in response to stress  
750 conditions. *Frontiers in plant science*. 2019;10:653.
- 751 45. Xue G-P, Sadat S, Drenth J, McIntyre CL. The heat shock factor family from *Triticum  
752 aestivum* in response to heat and other major abiotic stresses and their role in regulation of heat  
753 shock protein genes. *Journal of experimental botany*. 2014;65(2):539-57.
- 754 46. Scharf K-D, Berberich T, Ebersberger I, Nover L. The plant heat stress transcription  
755 factor (Hsf) family: structure, function and evolution. *Biochimica et Biophysica Acta (BBA)-  
756 Gene Regulatory Mechanisms*. 2012;1819(2):104-19.
- 757 47. LIU HC, LIAO HT, CHARNG YY. The role of class A1 heat shock factors (HSFA1s) in  
758 response to heat and other stresses in *Arabidopsis*. *Plant, cell & environment*. 2011;34(5):738-51.

- 759 48. Yoshida T, Ohama N, Nakajima J, Kidokoro S, Mizoi J, Nakashima K, et al. Arabidopsis  
760 HsfA1 transcription factors function as the main positive regulators in heat shock-responsive  
761 gene expression. *Molecular Genetics and Genomics*. 2011;286(5):321-32.
- 762 49. Shah Z, Iqbal A, Khan FU, Khan HU, Durrani F, Ahmad MZ. Genetic manipulation of  
763 pea (*Pisum sativum* L.) with Arabidopsis's heat shock factor HsfA1d improves ROS scavenging  
764 system to confront thermal stress. *Genetic Resources and Crop Evolution*. 2020:1-9.
- 765 50. Yoshida T, Sakuma Y, Todaka D, Maruyama K, Qin F, Mizoi J, et al. Functional analysis  
766 of an Arabidopsis heat-shock transcription factor HsfA3 in the transcriptional cascade  
767 downstream of the DREB2A stress-regulatory system. *Biochemical and biophysical research  
768 communications*. 2008;368(3):515-21.
- 769 51. Zhang X, Li J, Liu A, Zou J, Zhou X, Xiang J, et al. Expression profile in rice panicle:  
770 insights into heat response mechanism at reproductive stage. *Plos one*. 2012;7(11):e49652.
- 771 52. Zhu B, Ye C, Lü H, Chen X, Chai G, Chen J, et al. Identification and characterization of  
772 a novel heat shock transcription factor gene, GmHsfA1, in soybeans (*Glycine max*). *Journal of  
773 plant research*. 2006;119(3):247-56.
- 774 53. Soares-Cavalcanti NM, Belarmino LC, Kido EA, Pandolfi V, Marcelino-Guimarães FC,  
775 Rodrigues FA, et al. Overall picture of expressed Heat Shock Factors in *Glycine max*, *Lotus  
776 japonicus* and *Medicago truncatula*. *Genetics and molecular biology*. 2012;35(1):247-59.
- 777 54. Lin Y, Cheng Y, Jin J, Jin X, Jiang H, Yan H, et al. Genome duplication and gene loss  
778 affect the evolution of heat shock transcription factor genes in legumes. *PloS one*.  
779 2014;9(7):e102825.
- 780 55. Chidambaranathan P, Jagannadham PTK, Satheesh V, Kohli D, Basavarajappa SH,  
781 Chellapilla B, et al. Genome-wide analysis identifies chickpea (*Cicer arietinum*) heat stress  
782 transcription factors (Hsfs) responsive to heat stress at the pod development stage. *Journal of  
783 plant research*. 2018;131(3):525-42.
- 784 56. Ikeda M, Mitsuda N, Ohme-Takagi M. Arabidopsis HsfB1 and HsfB2b act as repressors  
785 of the expression of heat-inducible Hsfs but positively regulate the acquired thermotolerance.  
786 *Plant physiology*. 2011;157(3):1243-54.
- 787 57. Bharti K, von Koskull-Döring P, Bharti S, Kumar P, Tintschl-Körbitzer A, Treuter E, et  
788 al. Tomato heat stress transcription factor HsfB1 represents a novel type of general transcription  
789 coactivator with a histone-like motif interacting with the plant CREB binding protein ortholog  
790 HAC1. *The Plant Cell*. 2004;16(6):1521-35.
- 791 58. Hahn A, Bublak D, Schleiff E, Scharf K-D. Crosstalk between Hsp90 and Hsp70  
792 chaperones and heat stress transcription factors in tomato. *The Plant Cell*. 2011;23(2):741-55.
- 793 59. Fragkostefanakis S, Simm S, El-Shershaby A, Hu Y, Bublak D, Mesihovic A, et al. The  
794 repressor and co-activator HsfB1 regulates the major heat stress transcription factors in tomato.  
795 *Plant, cell & environment*. 2019;42(3):874-90.
- 796 60. Hernandez LD, Vierling E. Expression of low molecular weight heat-shock proteins  
797 under field conditions. *Plant Physiology*. 1993;101(4):1209-16.
- 798 61. Lenne C, Block M, Garin J, Douce R. Sequence and expression of the mRNA encoding  
799 HSP22, the mitochondrial small heat-shock protein in pea leaves. *Biochemical Journal*.  
800 1995;311(3):805-13.
- 801 62. Wu H-C, Bulgakov VP, Jinn T-L. Pectin methylesterases: Cell wall remodeling proteins  
802 are required for plant response to heat stress. *Frontiers in plant science*. 2018;9:1612.
- 803 63. Mohnen D. Pectin structure and biosynthesis. *Current opinion in plant biology*.  
804 2008;11(3):266-77.

- 805 64. Hasegawa K, Kamada S, Takehara S, Takeuchi H, Nakamura A, Satoh S, et al. Rice  
806 Putative Methyltransferase Gene OsPMT16 Is Required for Pistil Development Involving Pectin  
807 Modification. *Frontiers in Plant Science*. 2020;11:475.
- 808 65. Baldwin L, Domon J-M, Klimek JF, Fournet F, Sellier H, Gillet F, et al. Structural  
809 alteration of cell wall pectins accompanies pea development in response to cold. *Phytochemistry*.  
810 2014;104:37-47.
- 811 66. Li X, Li Y, Qu M, Xiao H, Feng Y, Liu J, et al. Cell wall pectin and its methyl-  
812 esterification in transition zone determine Al resistance in cultivars of pea (*Pisum sativum*).  
813 *Frontiers in plant science*. 2016;7:39.
- 814 67. Thévenin J, Pollet B, Letarnec B, Saulnier L, Gissot L, Maia-Grondard A, et al. The  
815 simultaneous repression of CCR and CAD, two enzymes of the lignin biosynthetic pathway,  
816 results in sterility and dwarfism in *Arabidopsis thaliana*. *Molecular Plant*. 2011;4(1):70-82.
- 817 68. Zhao Q, Tobimatsu Y, Zhou R, Pattathil S, Gallego-Giraldo L, Fu C, et al. Loss of  
818 function of cinnamyl alcohol dehydrogenase 1 leads to unconventional lignin and a temperature-  
819 sensitive growth defect in *Medicago truncatula*. *Proceedings of the National Academy of*  
820 *Sciences*. 2013;110(33):13660-5.
- 821 69. Zhao Q, Nakashima J, Chen F, Yin Y, Fu C, Yun J, et al. Laccase is necessary and  
822 nonredundant with peroxidase for lignin polymerization during vascular development in  
823 *Arabidopsis*. *The Plant Cell*. 2013;25(10):3976-87.
- 824 70. Shanmugavadeivel P, Sv AM, Prakash C, Ramkumar M, Tiwari R, Mohapatra T, et al.  
825 High resolution mapping of QTLs for heat tolerance in rice using a 5K SNP array. *Rice*.  
826 2017;10(1):28.
- 827 71. Salminen TA, Blomqvist K, Edqvist J. Lipid transfer proteins: classification,  
828 nomenclature, structure, and function. *Planta*. 2016;244(5):971-97.
- 829 72. Bogdanov IV, Shenkarev ZO, Finkina EI, Melnikova DN, Rumynskiy EI, Arseniev AS,  
830 et al. A novel lipid transfer protein from the pea *Pisum sativum*: isolation, recombinant  
831 expression, solution structure, antifungal activity, lipid binding, and allergenic properties. *BMC*  
832 *plant biology*. 2016;16(1):107.
- 833 73. Wang F, Zang X-s, Kabir MR, Liu K-l, Liu Z-s, Ni Z-f, et al. A wheat lipid transfer  
834 protein 3 could enhance the basal thermotolerance and oxidative stress resistance of *Arabidopsis*.  
835 *Gene*. 2014;550(1):18-26.
- 836 74. Ling H. Sequence analysis of GDSL lipase gene family in *Arabidopsis thaliana*. *Pakistan*  
837 *journal of biological sciences: PJBS*. 2008;11(5):763-7.
- 838 75. Lai C-P, Huang L-M, Chen L-FO, Chan M-T, Shaw J-F. Genome-wide analysis of  
839 GDSL-type esterases/lipases in *Arabidopsis*. *Plant molecular biology*. 2017;95(1):181-97.
- 840 76. Mayfield JA, Fiebig A, Johnstone SE, Preuss D. Gene families from the *Arabidopsis*  
841 *thaliana* pollen coat proteome. *Science*. 2001;292(5526):2482-5.
- 842 77. Higashi Y, Okazaki Y, Myouga F, Shinozaki K, Saito K. Landscape of the lipidome and  
843 transcriptome under heat stress in *Arabidopsis thaliana*. *Scientific reports*. 2015;5(1):1-11.

844

## 845 **Supporting information**

846 **S1 Table. Over-representative GO terms with significance p value in the anther's**



847 **consistently up-regulated genes among three pea varieties.**

848

849 **S2 Table. Genes in GO:0055114, oxidation-reduction process was upregulated in PR11-2**  
850 **and CDC Amarillo or down-regulated in PR11-90 and CDC Amarillo.**

851

852 **S3 Table. Overlapping of heat responsive genes between our study and Tafesse et al. (2020).**

853 Note: Trait names, SPAD: Soil plant analysis development meter for the estimation of leaf  
854 chlorophyll concentration, CT: canopy temperature, RSL: reproductive, PN: pod number. Red  
855 cell represents up-regulated gene expression at HS in our study, whereas blue cell represents a  
856 down-regulation.

857 **S1 Fig. qPCR primer efficiency standard curves.**

858

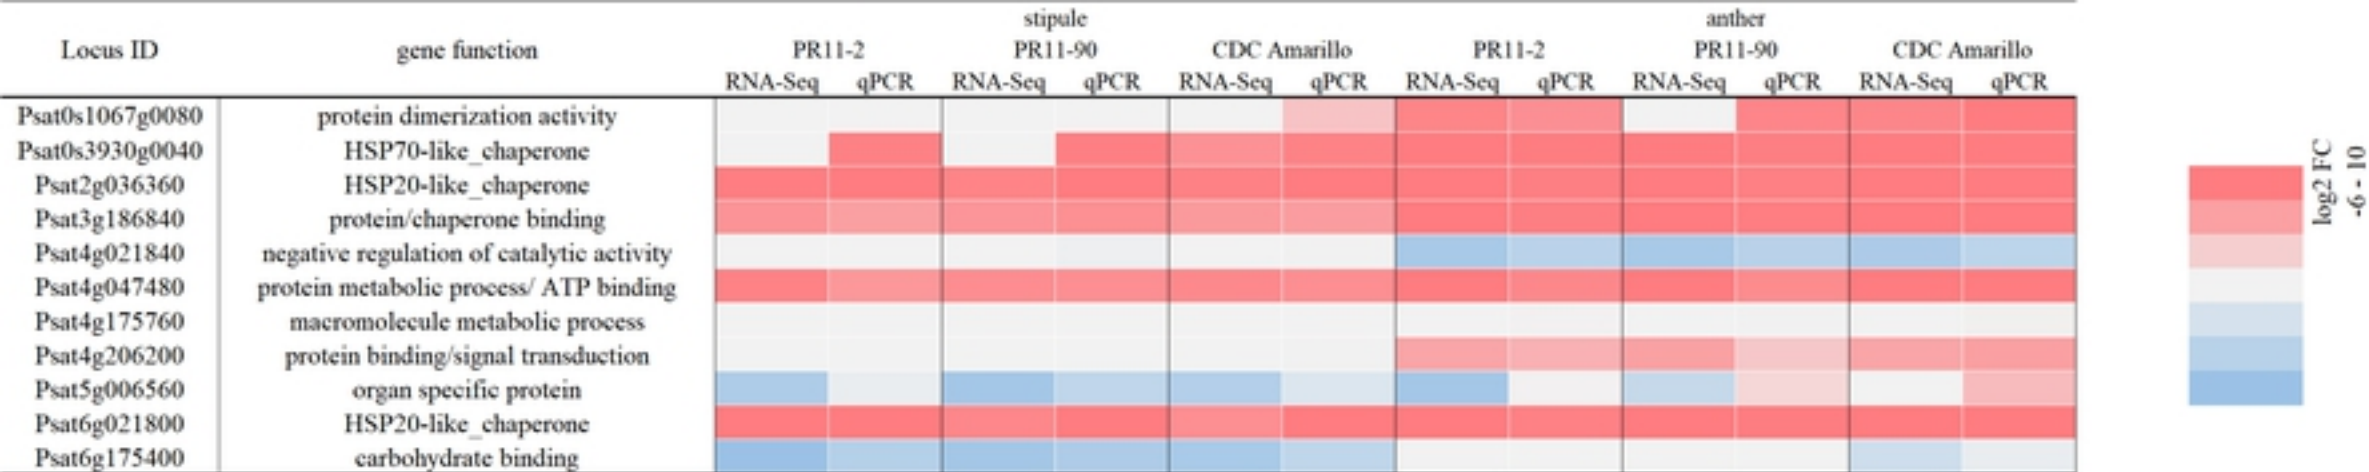

Fig 1

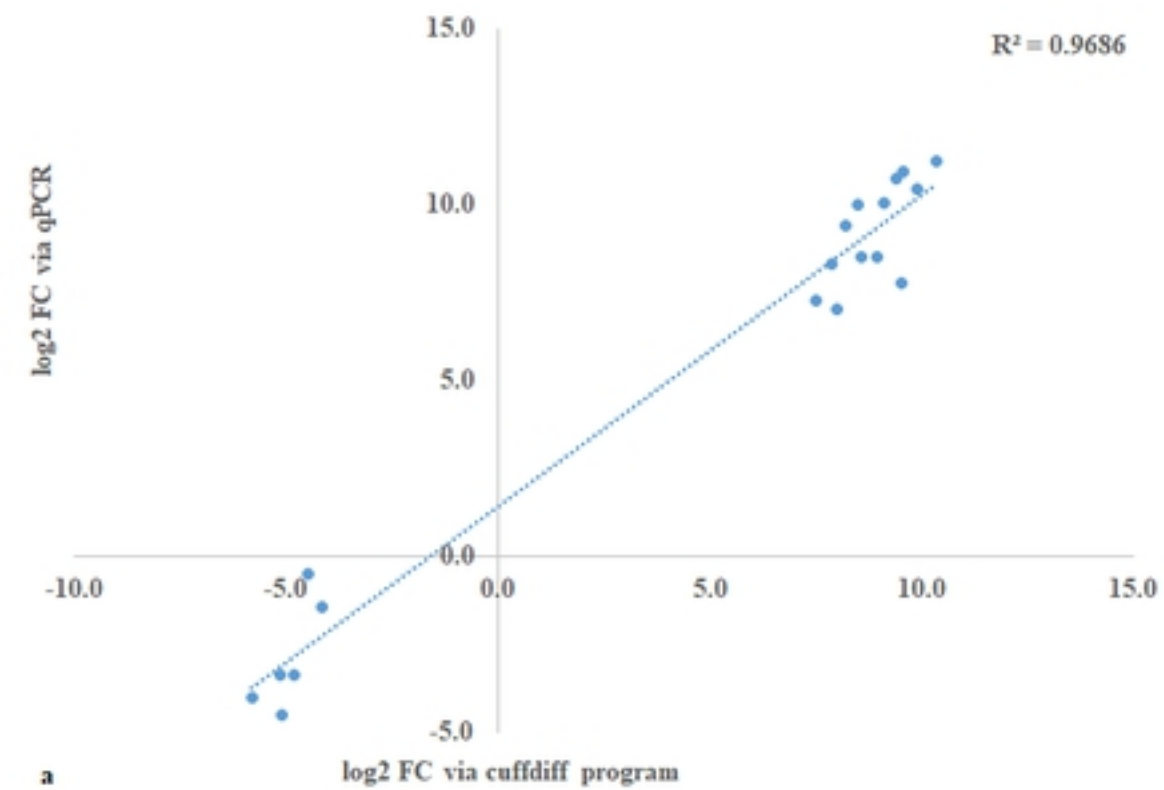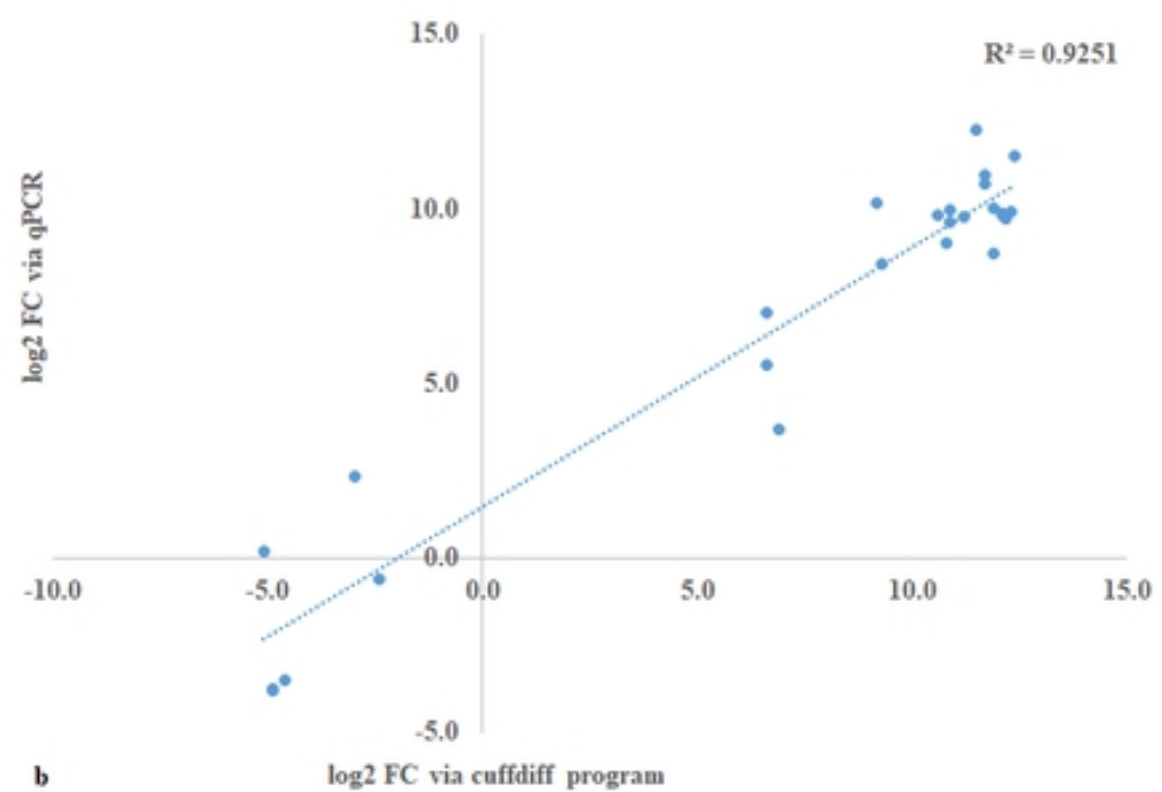

Fig 2

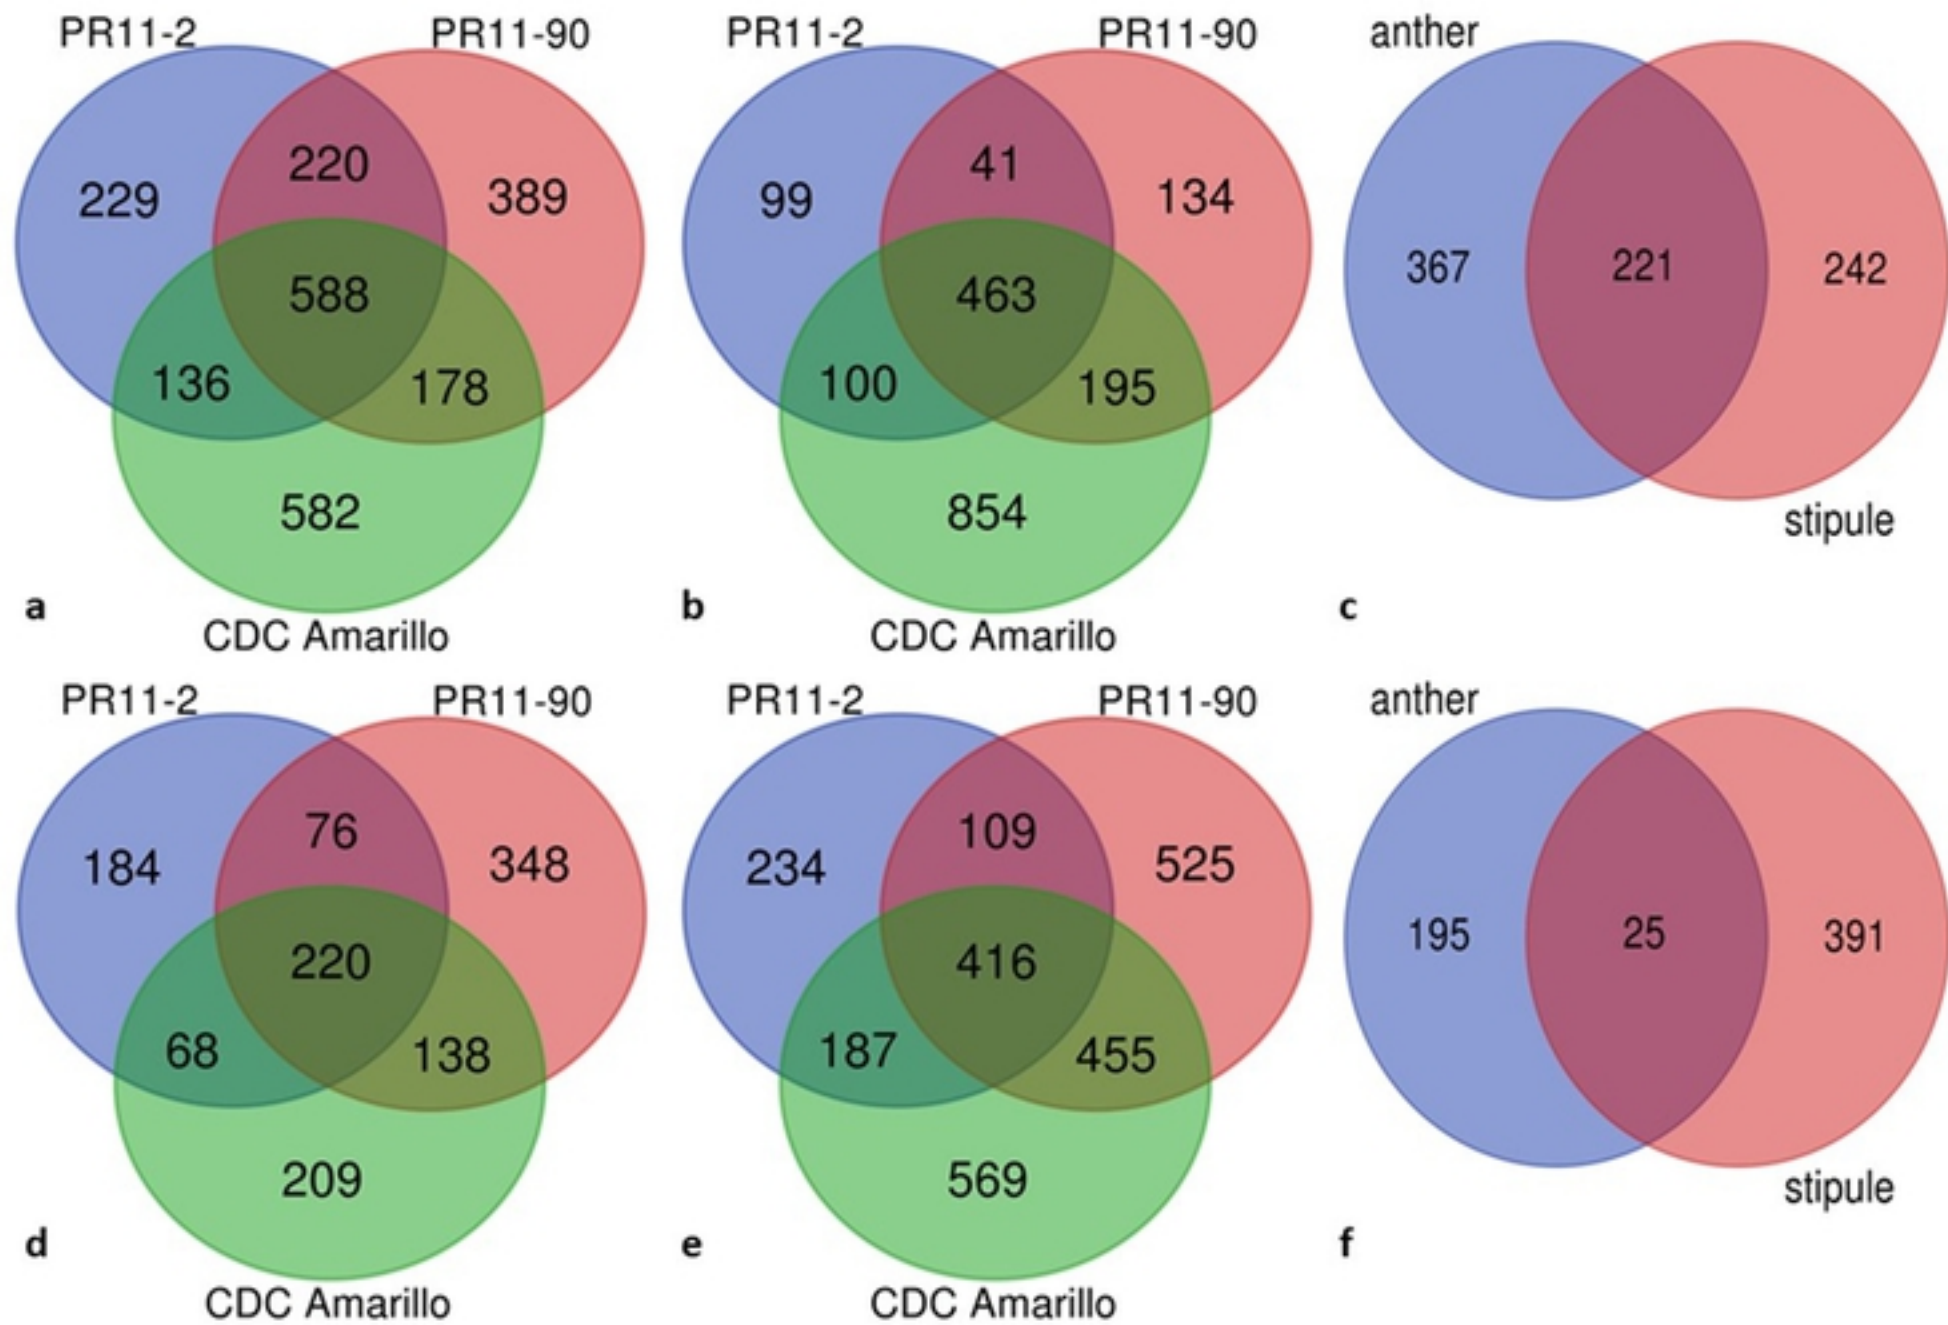

Fig 3

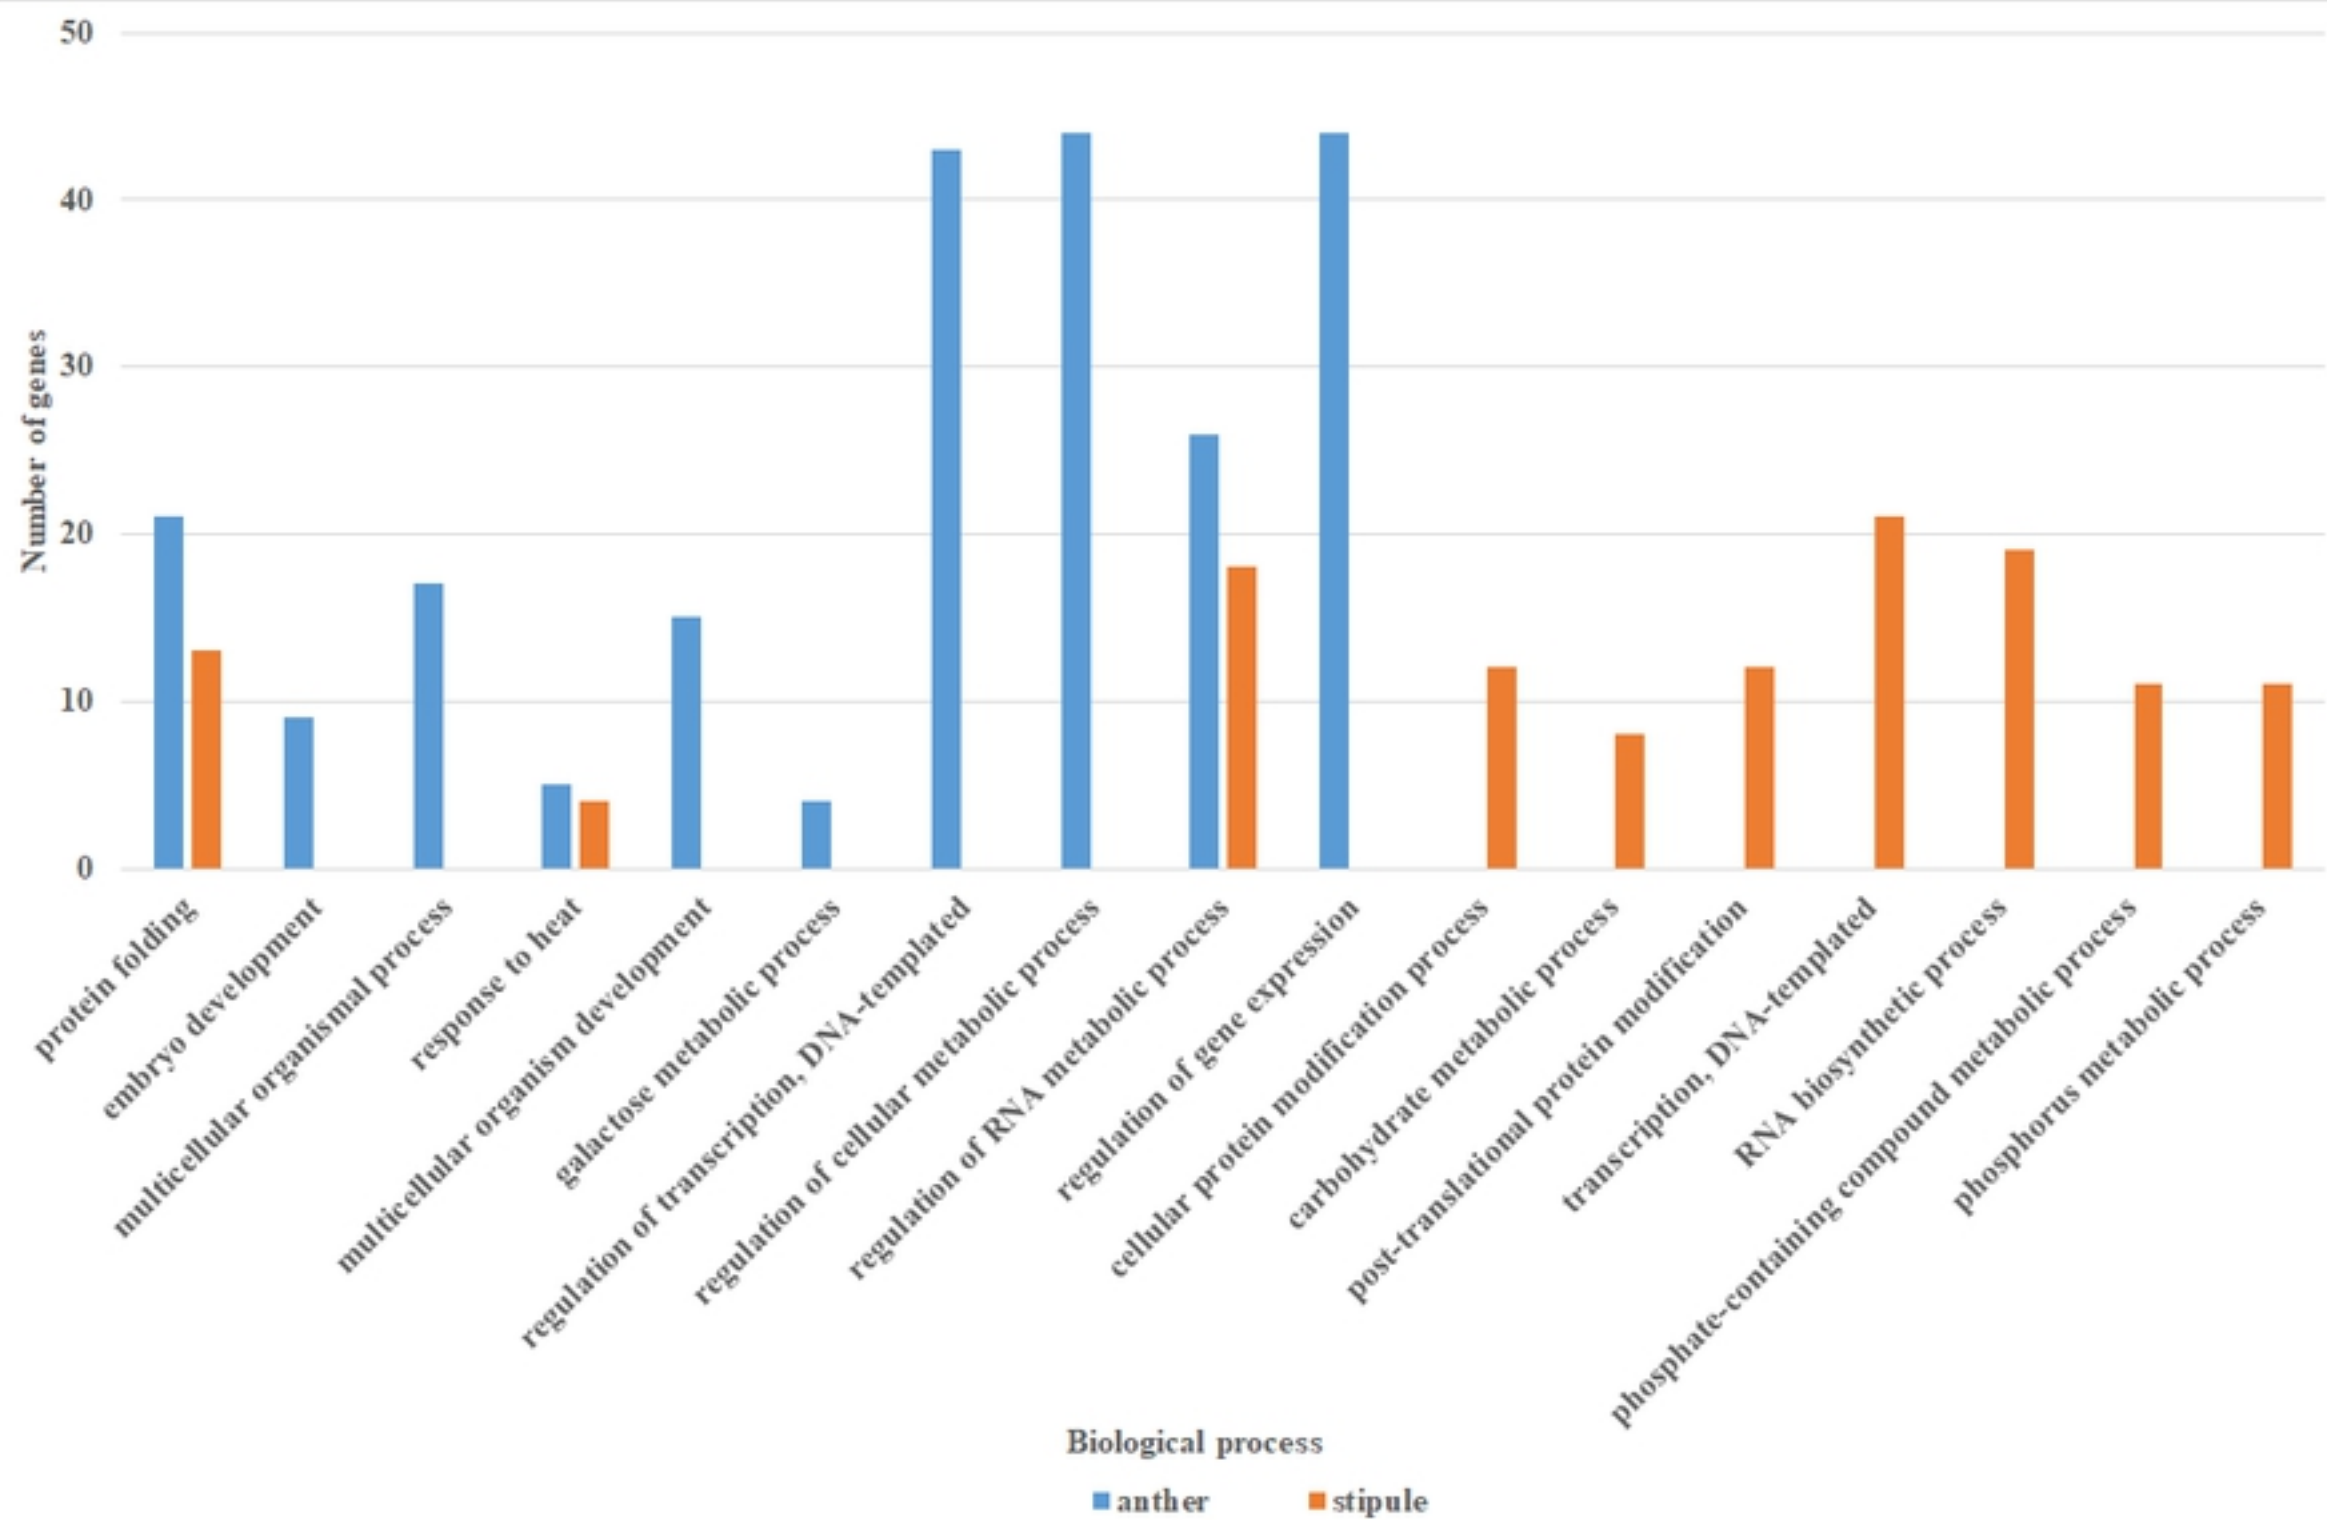

Fig 4

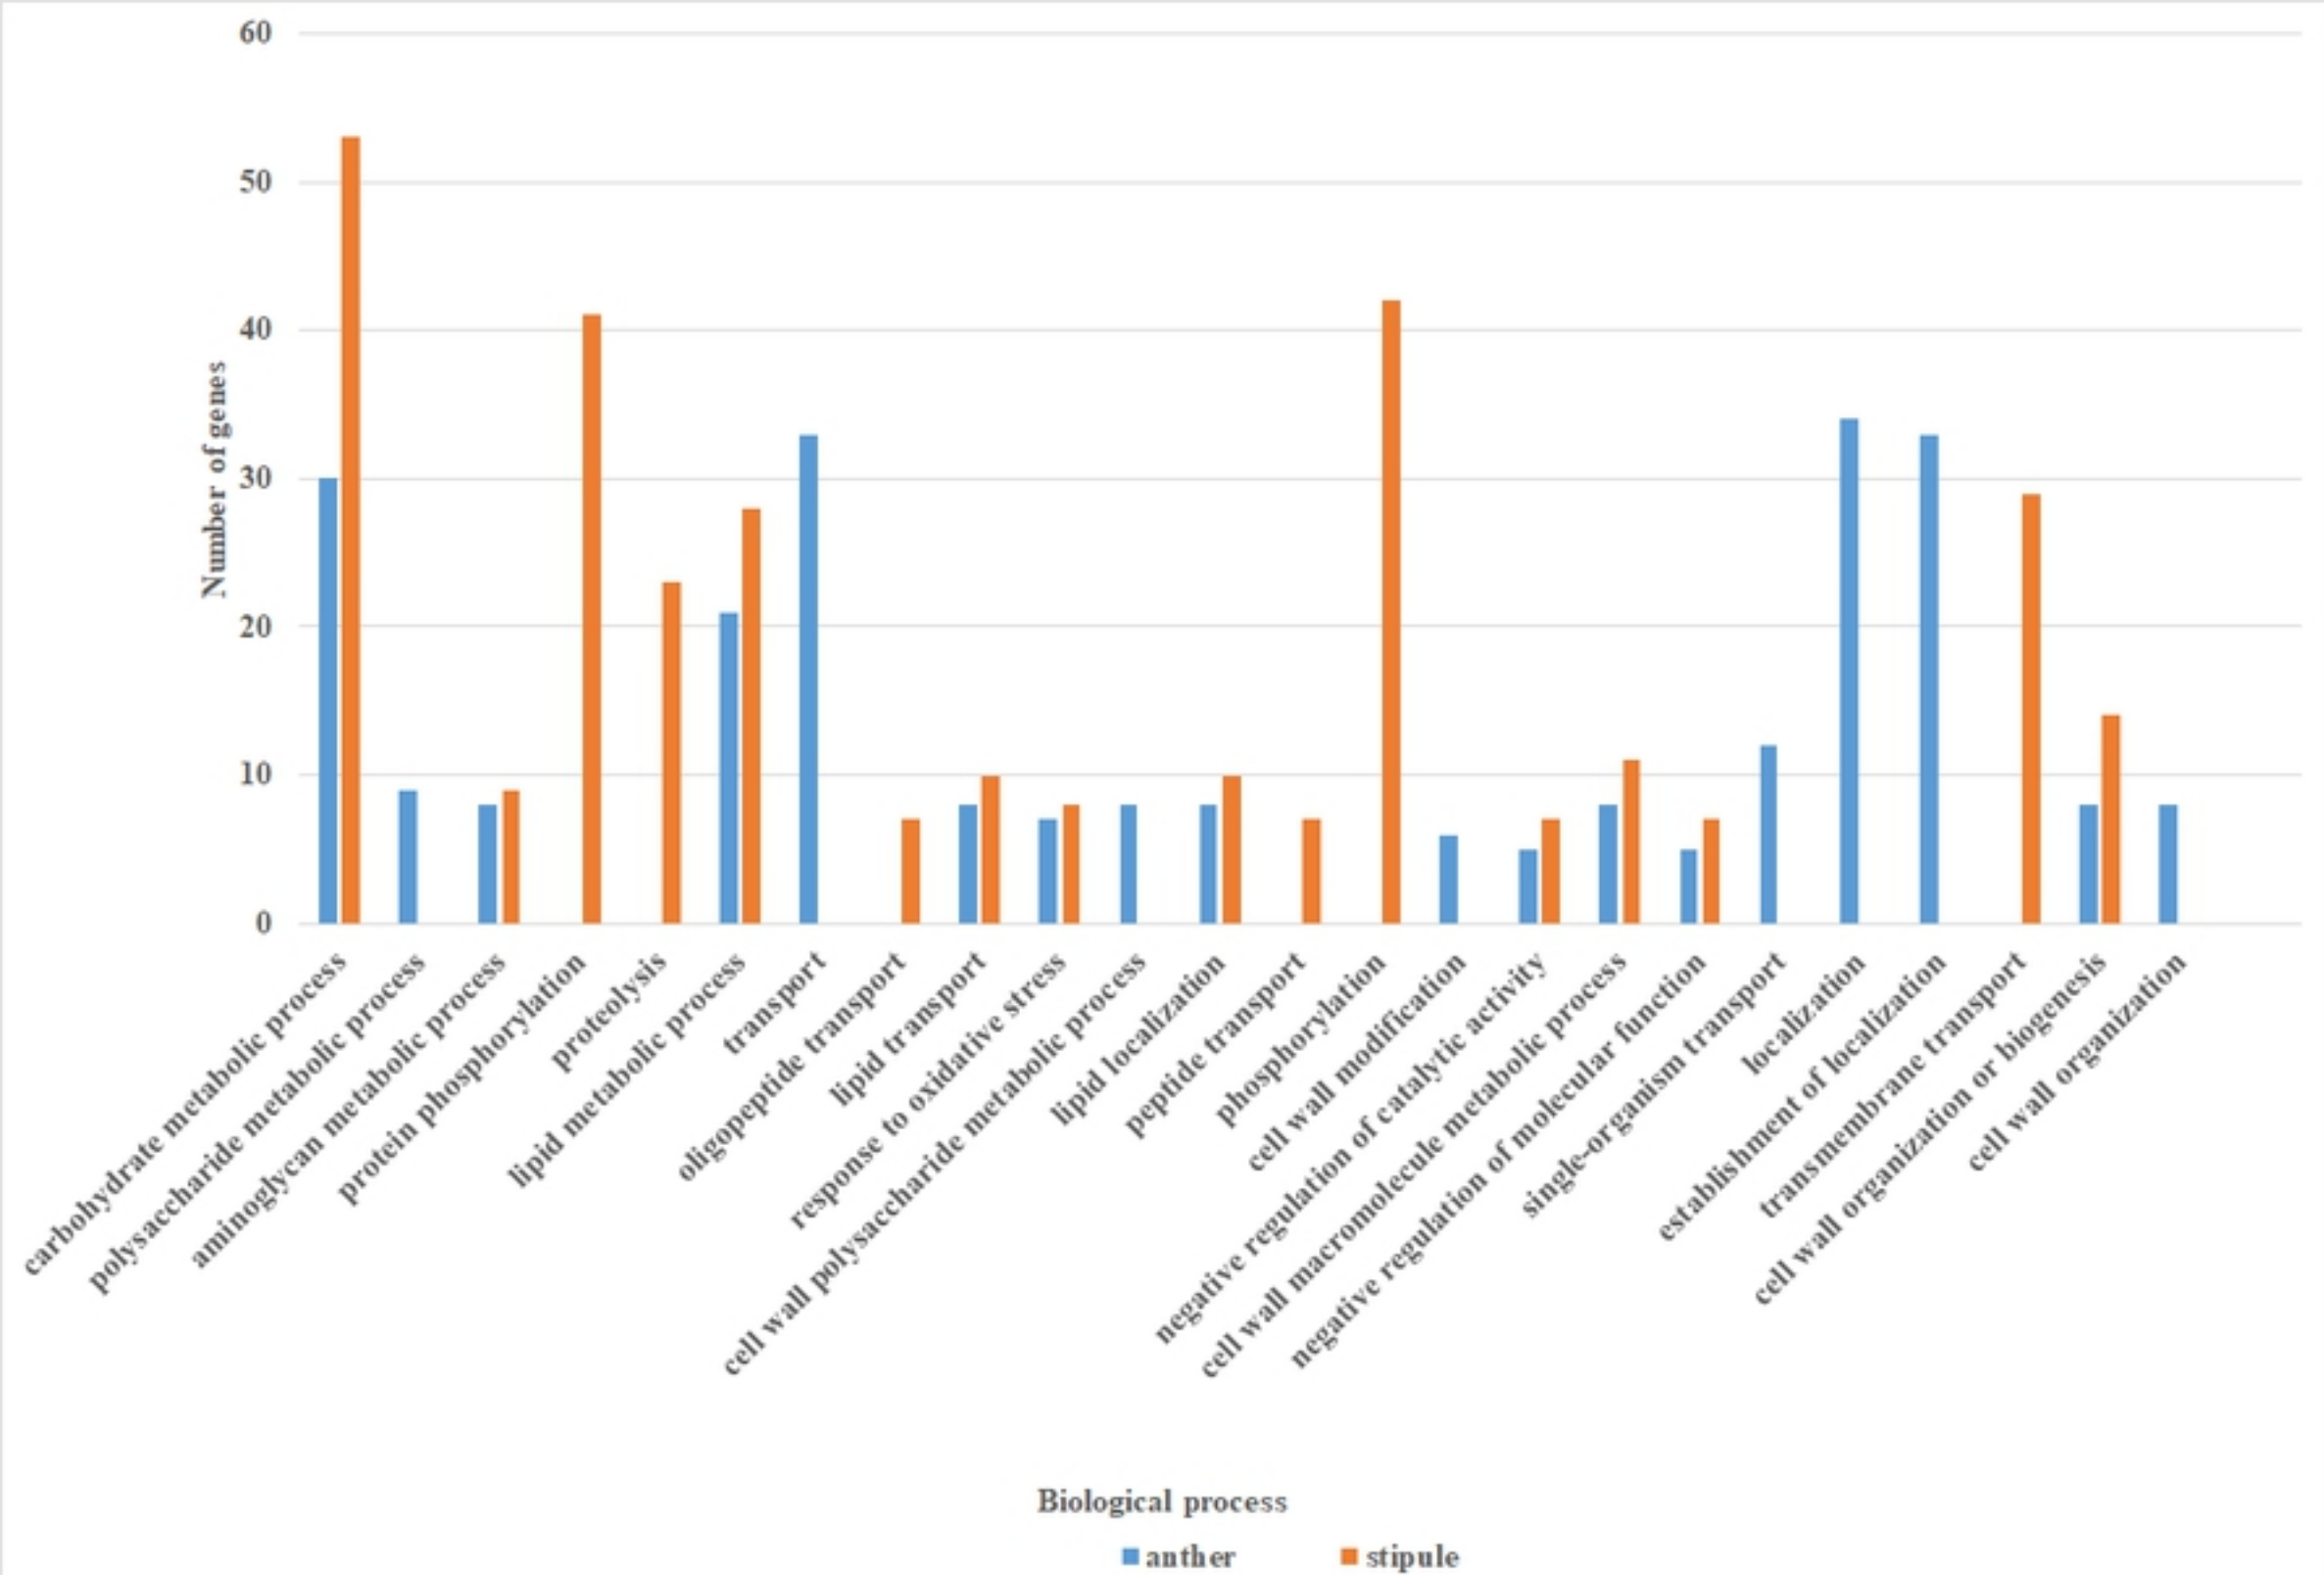

Fig 5

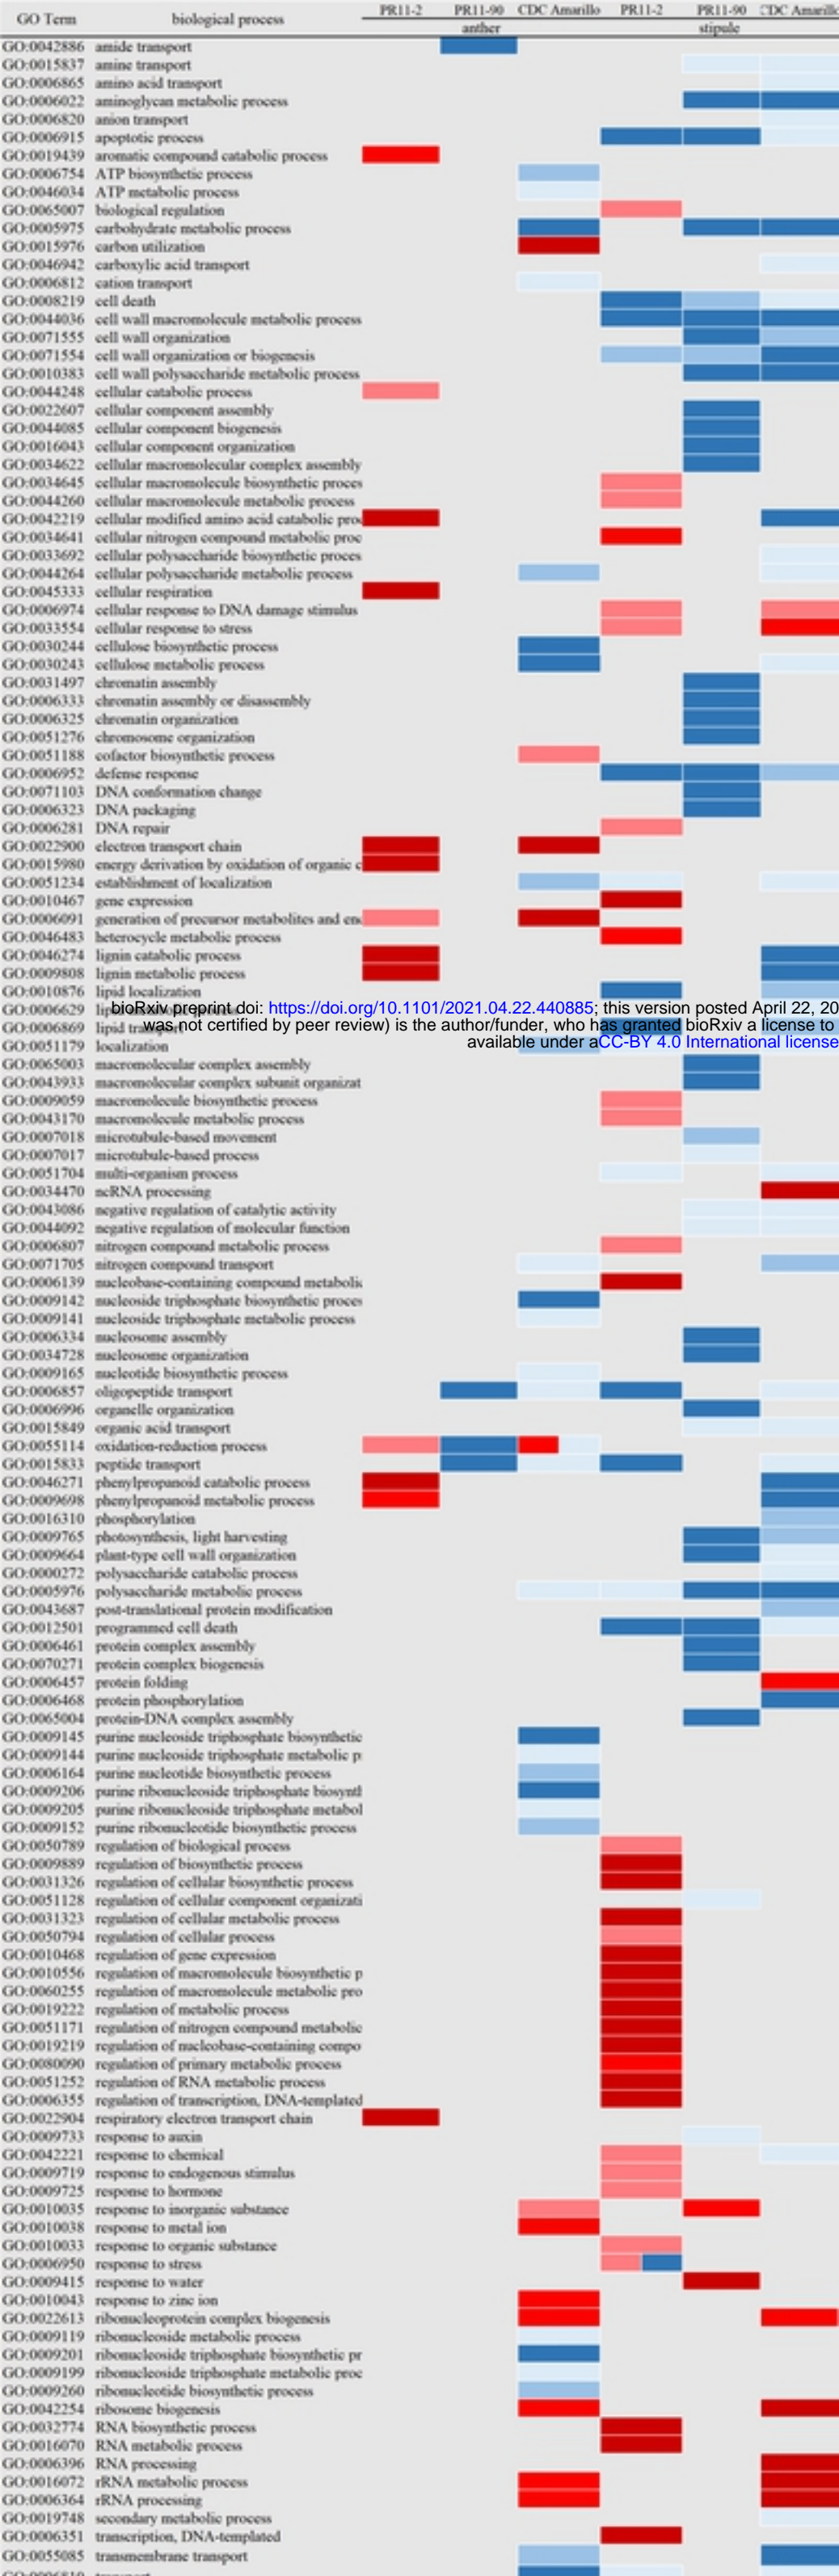

bioRxiv preprint doi: <https://doi.org/10.1101/2021.04.22.440885>; this version posted April 22, 2021. The copyright holder for this preprint (which was not certified by peer review) is the author/funder, who has granted bioRxiv a license to display the preprint in perpetuity. It is made available under aCC-BY 4.0 International license.

Fig 6
